1 **Impact of *Starmerella bacillaris* and *Zygosaccharomyces bailii* on ethanol reduction**  
2 **and *Saccharomyces cerevisiae* metabolism during mixed wine fermentations**

3

4 Angela Capece<sup>1\*</sup>, Angela Pietrafesa<sup>2</sup>, Gabriella Siesto<sup>1</sup>, Rocchina Pietrafesa<sup>1</sup>, Víctor Garrigós<sup>4</sup>, Patrizia  
5 Romano<sup>3</sup>, Emilia Matallana<sup>4</sup>, Agustín Aranda<sup>4\*</sup>

6

7 1. Scuola di Scienze Agrarie, Forestali, Alimentari ed Ambientali, Università degli Studi della Basilicata,  
8 85100 Potenza, Italy.

9 2. Dipartimento delle Culture Europee e del Mediterraneo, Università degli Studi della Basilicata,  
10 75100 Matera, Italy.

11 3. Dipartimento di Economia, Universitas Mercatorum, 00186 Rome, Italy.

12 4. Institute for Integrative Systems Biology, I2SysBio, University of Valencia-CSIC. Paterna, Spain.

13 \*corresponding authors: [agustin.aranda@csic.es](mailto:agustin.aranda@csic.es); [angela.capece@unibas.it](mailto:angela.capece@unibas.it)

14

15

16

17

18

19

20

21

22        **Abstract**

23        The bulk of grape juice fermentation is carried out by the yeast *Saccharomyces cerevisiae*, but  
24        non-*Saccharomyces* yeasts can modulate many sensorial aspects of the final products in ways not  
25        well understood. In this study, some of such non-conventional yeasts were screened as mixed  
26        starter cultures in a fermentation defined medium in both simultaneous and sequential  
27        inoculations. One strain of *Starmerella bacillaris* and another of *Zygosaccharomyces bailii* were  
28        chosen by their distinct phenotypic footprint and their ability to reduce ethanol levels at the end  
29        of fermentation, particularly during simultaneous vinification. *S. bacillaris* losses viability strongly  
30        at the end of mixed fermentation, while *Z. bailii* remains viable until the end of vinification.  
31        Interestingly, for most non-*Saccharomyces* yeasts, simultaneous inoculation helps for survival at  
32        the end of fermentation compared to sequential inoculation. *S. cerevisiae* viability was unchanged  
33        by the presence of the either yeast. Characterization of both strains indicates that *S. bacillaris*  
34        behavior is overall more different from *S. cerevisiae* than *Z. bailii*. *S. bacillaris* has a less strict  
35        glucose repression mechanism and molecular markers like catabolite repression kinase Snf1 is  
36        quite different in size. Besides, *S. cerevisiae* transcriptome changes to a bigger degree in the  
37        presence of *S. bacillaris* than when inoculated with *Z. bailii*. *S. bacillaris* induces the translation  
38        machinery and repress vesicular transport. Both non-*Saccharomyces* yeast induce *S. cerevisiae*  
39        glycolytic genes, and that may be related to ethanol lowering, but there are specific aspects of  
40        carbon-related mechanisms between strains: *Z. bailii* presence increases the stress-related  
41        polysaccharides trehalose and glycogen while *S. bacillaris* induces gluconeogenesis genes.

42

43        **Keywords:** wine; non-*Saccharomyces* yeasts; mixed fermentations; ethanol; transcriptomics;  
44        *Starmerella bacillaris*; *Zygosaccharomyces bailii*.

45

46

## 47           **1. Introduction**

48           Producing wine from grape juice in a traditional way relies on spontaneous fermentation carried  
49 out by the microorganisms present on the grape surface and the winery equipment (Ribéreau-Gayon et  
50 al., 2006). That implies a complex ecological environment where first yeast, filamentous fungi and  
51 bacteria coexist, next only some species of yeasts adapted to the acidic and low oxygen environment  
52 proliferate and at the end species of *Saccharomyces* take over due to their high fermentative power and  
53 tolerance to ethanol to complete fermentation. The non-*Saccharomyces* (NS), so-called non-  
54 conventional yeasts, despite their low fermentative power, contribute greatly to the final product (Jolly  
55 et al., 2014)(Benito et al., 2019), as these yeasts produce specific metabolites affecting the wine aroma,  
56 or produce enzymes that help liberating volatile compound from the grape (Capece and Romano, 2019).  
57 The use of non-*Saccharomyces* yeasts as starters might satisfy an additional request of winemakers, as  
58 it could be a potential tool for the reduction of alcohol content in wine. Nowadays, the increase of  
59 alcohol levels in wine is one of the main challenges affecting the winemaking sector, due to global  
60 climate change which determined an increase of grape maturity (De Orduna, 2010). In this context, the  
61 interest for reduction of ethanol content in wine was increased and among the available tools addressed  
62 to this aim, the microbiological approach appears a promising way. In particular, researchers' interest  
63 was addressed to investigate the wide variability in ethanol yield among non-*Saccharomyces* yeasts, that  
64 could be a potential tool for the reduction of alcohol content in wine (Gonzalez et al., 2013) (Contreras  
65 et al., 2015). Low ethanol yield for instance was found in mixed fermentations with some strains  
66 belonging to *Hanseniaspora*, and *Zygosaccharomyces* (Gobbi et al., 2014) and *Starmerella* (Milanovic et  
67 al., 2012) genera .

68           Modern enology has developed pure yeast starters to obtain a more reliable fermentation. The  
69 usual way to delivered them is in the form of active dry yeast (Pérez-Torrado et al., 2015). Inoculation  
70 with strains of *S. cerevisiae* make the whole fermentation process more robust and reliable, but it lacks  
71 some of the richness that more microbiologically complex fermentations have. This aspect contributed  
72 to an increased interest on the use of non-*Saccharomyces* yeasts in winemaking (Benito et al.,

73 2019)(Padilla et al., 2016) and in the latest years NS yeasts have been added to the portfolio of yeast  
74 manufacturers, so dry starters for *Torulasporea*, *Metschnikowia*, *Kluyveromyces*, *Wicheranomyces*,  
75 *Lanchacea* and *Schizosaccharomyces* are marketed [7]. Furthermore, some strains that are not so  
76 widespread in the market have interesting winemaking properties, but they need more physiological  
77 characterization.

78 Apiculate yeasts *Hanseniaspora* are the main species present on mature grapes and they produce  
79 enzymes and aroma compounds that expand the diversity of wine color and flavor (Martin et al., 2018).  
80 A strain of *Hanseniaspora uvarum* is able to reduce ethanol in mixed fermentations (Gobbi et al., 2014).  
81 *Starmerella bacillaris* (former *Candida zemplinina*) is an interesting species for the enological point of  
82 view. It is a fructophilic yeast and a high glycerol producer, but it produces low ethanol after  
83 fermentation, both alone and in mixed fermentation (Englezos et al., 2016)(Lemos Junior et al., 2021).  
84 It produces high alcohols, such as benzyl alcohol that inhibit fungal growth. However, it is only produced  
85 as cream yeast (Roudil et al., 2019). *Zygosaccharomyces* have been regarded as spoilage yeasts due to  
86 their high tolerance to osmotic and acidic stress (Escott et al., 2018). *Zygosaccharomyces* found in grapes  
87 and musts are able to increase the production of higher alcohol and reduce acetoin. *Z. bailii* produced  
88 wine with reduced ethanol concentration (Contreras et al., 2015)(Zhu et al., 2020).

89 Since most non-*Saccharomyces* yeasts are unable of completing alcoholic fermentation, *S.*  
90 *cerevisiae* strains should be added in simultaneous or sequentially inoculum modality. When planning  
91 mixed fermentations, simultaneous inoculation is the simplest way to proceed, but sequential  
92 inoculation (first NS and then *Saccharomyces*) give time to the non-conventional yeast to contribute to  
93 the final product with no competitions from *Saccharomyces*. Grape must fermentation, even with just  
94 one yeast strains inoculated, is a complex ecological system. There are many kind of interactions, both  
95 biotic and abiotic, that link the performance of wine yeasts (Ciani et al., 2016). The most obvious of these  
96 interaction is the competition for the nutrients of the grape juice, usually the less abundant ones, like  
97 amino acids and vitamins (Medina et al., 2012). More direct interactions rely in the production of toxic  
98 molecules, like killer factors, antimicrobial peptides and medium-chain fatty acids. Furthermore, direct

99 cell-to-cell interactions have been linked to the early death of *T. delbrueckii*, *K. thermotolerans* and *S.*  
100 *bacillaris* by *S. cerevisiae* (Renault et al., 2013)(Nissen et al., 2003)(Englezos et al., 2019b). All those  
101 interactions are crossed, so we need more information on the molecular causes behind the metabolic  
102 relationships between yeasts that coexist during fermentation.

103 In this work, a series of potential interesting wine species, were screened in a defined medium for  
104 the use as mixed starters with *S. cerevisiae*, by exploring different inoculation regimes in order to  
105 establish the inoculum conditions and mixed starter culture that enable the production of wine with  
106 reduced ethanol concentration. Two good ethanol-reducing strains (a *S. bacillaris* and a *Z. bailii*) that  
107 have an overall impact in metabolites production during fermentations were chosen for a deep analysis  
108 of strain physiology. *S. bacillaris* dies at a highest rate than *Z. bailii* in such fermentations. The physiology  
109 of those yeasts in selective media happened to be quite different, so the impact of them in the *S.*  
110 *cerevisiae* transcriptomic during mixed fermentations in synthetic grape juice was evaluated to see  
111 common and differential impacts. *S. bacillaris* behavior is less similar to *S. cerevisiae* than *Z. bailii*, and  
112 cause a greater change in *S. cerevisiae* transcription. Both yeast induce glycolysis, but *S. bacillaris* up-  
113 regulates also gluconeogenesis and *Z. bailii* the synthesis of stress polysaccharides like trehalose and  
114 glycogen.

115

## 116 **2. Materials and methods**

### 117 **2. 1. Yeast strains**

118 Eight non-*Saccharomyces* yeast strains, belonging to UNIBAS Yeast Collection (UBYC),  
119 University of Basilicata (Potenza, Italy), were tested in the first step of this study. The tested  
120 strains were the following: one *Debaryomyces polymorphus* (Db2), two *Hanseniaspora uvarum*  
121 strains (H3 and H9), four *Starmerella bacillaris* strains (St1, St2, St5 and St8) and one  
122 *Zygosaccharomyces bailii* (Zb1). All the strains were previously isolated during spontaneous lab-  
123 scale fermentations of grape of different varieties, directly collected in the vineyard, or fruit

124 (prickly pear). These strains were identified by restriction analysis of the amplified ITS region  
125 (Granchi et al., 1999); the results of restriction analysis were confirmed by analysis of ITS  
126 sequences, which were then blasted with NCBI database. In addition, one commercial *S.*  
127 *cerevisiae* strain, EC1118 (Lallemand Inc.), was used.

## 128 **2.2. Stress and growth tests**

129 Strain tolerance to ethanol and SO<sub>2</sub>, expressed as the ratio between the growth in  
130 microplates in broth with (14% v/v ethanol and 150 mg/L SO<sub>2</sub> respectively) and without the  
131 stress factor. β-glucosidase and β-xylosidase were measured as previously described  
132 (Manzanares et al., 2000)(Manzanares et al., 1999). For the spot analysis, stationary cultures  
133 grown in YPD medium (2% glucose, 2% peptone, 1% yeast extract) overnight were serially  
134 diluted and 5 μl drops were spotted in YPD, YPS (changing glucose by 2% sucrose), YPG (2%  
135 glycerol), SD (25 glucose, 0.17% Yeast Nitrogen Base, 0.5% ammonium sulfate) or SPro (SD with  
136 0.5% proline as nitrogen source). Glucose analog 2-deoxyglucose (2DG) was added to the YPS  
137 plates at 200 ng/ml for glucose repression tests. For the H<sub>2</sub>O<sub>2</sub> oxidative stress test, the  
138 equivalent of 2 OD<sub>600</sub> of overnight YPD cultures were spread on YPD plates and paper circles  
139 containing 5 circles containing 5 μl of 30% H<sub>2</sub>O<sub>2</sub> was placed in the middle and diameter of  
140 inhibition halos were measured the following day. To test growth in molasses, the biomass  
141 propagation experiments were performed in molasses medium (Torrellas et al., 2020) diluted  
142 to 60 g/L sucrose. Cells were cultivated at 30 C with shaking (180 rpm) and growth was followed  
143 by OD<sub>600</sub> and ethanol determined enzymatically with a kit (Megazyme International Ireland Ltd).

144

## 145 **2.3. Mixed fermentations**

146 The selected strains were tested in laboratory scale fermentations using synthetic grape  
147 juice medium (Fleet, 1993), indicated in the OIV-OENO 370-2012 resolution. The final

148 concentration of sugars was 230 g/L (115 g/L of glucose and 115 g/L of fructose), pH adjusted  
149 to 3.5. The fermentations were carried out in sterile 130 mL flasks filled with 100 mL of  
150 synthetic must, equipped with stoppers and kept under static conditions at 26°C. The flasks  
151 were inoculated with 48-h pre-cultures grown in YPD broth at 26°C with shaking. Each non-  
152 *Saccharomyces* strain was inoculated in combination with the *S. cerevisiae* strain in two  
153 different modalities, sequential (SeF) and simultaneous (SiF) inoculum. In the SeF trials, the  
154 inoculum ratio was 1:1, with an inoculation ratio of  $1 \times 10^7$  cells/mL for both the strains, but the  
155 non-*Saccharomyces* strain was inoculated at time 0, whereas the *S. cerevisiae* strain was added  
156 when the alcohol content reach about 5% (v/v). In the SiF trials, the two strains were  
157 simultaneously inoculated, but at different inoculum levels ( $1 \times 10^3$  cells/mL for *S. cerevisiae*  
158 strain and  $1 \times 10^7$  cells/mL for the non-*Saccharomyces* strain). *S. cerevisiae* EC1118 at  
159 concentration of  $1 \times 10^7$  cells/mL was used as control.

160 The fermentation kinetics were monitored daily by measuring the weight loss of the flasks  
161 (due to the carbon dioxide release) and sugar consumption. The kinetic growth of yeast strains  
162 was checked by plate counting of fermenting must samples on two different agar media,  
163 Wallerstein Laboratory (WL) Nutrient Agar medium (Sigma-Aldrich) (Pallmann et al., 2001) and  
164 Lysine Agar medium (Oxoid Unipath Ltd, Hampshire, UK) with addition of bromocresol green.  
165 Dilution plates containing a statistically representative number of colonies were counted.

#### 166 **2.4. Analytical Determinations**

167 Experimental wines obtained from the inoculated fermentation were analyzed for  
168 conventional chemical parameters, such as ethanol, total acidity, malic and lactic acid, volatile  
169 acidity, residual sugars, glucose, fructose, pH, by a Fourier Transfer Infrared WineScan  
170 instrument (OenoFoss™, Hillerød, Denmark). The content of the main secondary influencing  
171 wine aroma, such as acetaldehyde, n-propanol, isobutanol, amyl alcohols, ethyl acetate and

172 acetoin, were determined by direct injection gas chromatography of 1  $\mu$ l sample into a 180 cm  
173  $\times$  2 mm glass column packed with 80/120 Carbopack B/5% Carbowax 20 M (Supelco, Bellefonte,  
174 PA). The column was run from 70 to 140  $^{\circ}$ C, the temperature being ramped up at a rate of 7  
175  $^{\circ}$ C/min. The carrier gas was helium at a flow rate of 20 ml/min. Levels of the secondary  
176 compounds were determined by calibration lines, as described by Capece et al. (Capece et al.,  
177 2013). Analysis of variance (ANOVA) was used to evaluate differences in chemical compounds  
178 of the experimental wines obtained by different inoculation modalities, by using Tukey's test to  
179 compare the mean values. Principal component analysis (PCA) was carried out on the data of  
180 wines produced from mixed starters at laboratory scale. The PAST3 software ver. 3.20  
181 (Hammer, Harper, & Ryan, 2018) was used for the statistical analyses.

182

## 183 **2.5. Western blot**

184 To analyze Snf1 activation and peroxiredoxin status, proteins were extracted by fast cell  
185 lysis with trichloroacetic acid (TCA) (Orlova et al., 2008). 5.5% TCA was added to 5 OD<sub>600</sub> units  
186 of cells, the mix was incubated on ice for 15 min and centrifuged. The pellet was washed with  
187 acetone twice and resuspended in 150  $\mu$ L of 10 mM Tris-HCl, pH 7.5, 1 mM EDTA, and broken  
188 with 150  $\mu$ L of 0.2 M NaOH. SDS-PAGE was carried out in an Invitrogen Novex mini-gel device,  
189 gel was blotted onto PVDF membranes a Novex semy dry blotter (Invitrogen). The membrane  
190 was probed with either anti-AMPK $\alpha$  (Thr172, Cell Signalling Technologies), anti 2-Cys-Prx  
191 (Abcam) or anti-Prx-SO<sub>3</sub> (abcam) antibodies. Anti-actin (Sigma) was used as loading control. The  
192 ECL Western blotting detection system (GE) was used following the manufacturer's instructions  
193 in a ImageQuant LAS500 (GE).

194

195



196           **2.6. Transcriptomic analysis**

197           Fermentation were carried out in synthetic must, inoculating simultaneously *S. cerevisiae*  
198 always at  $1 \times 10^6$  cells/mL and either non-*Saccharomyces* at  $1 \times 10^7$  cells/mL. Cells were taken  
199 after 24 h of growth. Total RNA was isolated from yeast pellet using the RNeasy mini kit (Qiagen)  
200 following the manufacturer's instructions for yeast. RNA quality was assessed by using  
201 TapeStation System 4200 (Agilent Technologies, Santa Clara, CA, USA). All samples presented  
202 an RNA Integrity Number (RIN) value  $\geq 8.00$ . Libraries were prepared using 1  $\mu$ g of RNA with  
203 TruSeq<sup>®</sup> stranded mRNA Preparation Kit (Illumina, San Diego, CA, USA) followed by sequencing  
204 with a Novaseq 6000 sequencer using 150 base read lengths in paired-end mode (Illumina, San  
205 Diego, CA, USA) according to manufacturer's protocol in the facilities of ADM LifeSequencing  
206 (Paterna, Spain). Bcl format files were processed to transform them to FASTQ format files using  
207 the BCL2FASTQ (version 2.20) software. The reads were trimmed based on their quality,  
208 (threshold  $< Q20$ ) with bbmap software. Adapters and duplicated reads produced by Illumina  
209 sequencing were furthermore trimmed with cutadapt v3.0. Clean sequences were mapped  
210 against EC1118 *Saccharomyces cerevisiae* reference genome with SALMON software (Patro et  
211 al., 2017). This software maps against the reference genomes and creates a count matrix that  
212 will be used in further steps. Differential expression was measured using DESeq2 software (Love  
213 et al., 2014) . Enrichment functional analysis of the DEG was carried out using gene ontology  
214 (GO) databases implemented in the GENEONTOLOGY api (Mi et al., 2019) which performs  
215 enrichment by Fisher's Exact Test and corrects by FDR.

216

217

218

219

## 220 3. Results

### 221 3.1. Characterization of eight non-*Saccharomyces* strains by mixed fermentations: sequential 222 and co-inoculations.

223 Eight wild non-*Saccharomyces* strains, belonging to different species and coded with Db2  
224 (*Debaryomyces polymorphus*), Ha3, Ha9 (*Hanseniaspora uvarum*), St1, St2, St5, St8 (*Starmerella*  
225 *bacillaris*) and Zb1 (*Zygosaccharomyces bailii*), were tested in the first step of the research activity. Table  
226 1 shows the characteristics of enological interest of the selected yeast strains, like enzyme activities and  
227 stress tolerance. *H. uvarum* (Ha3, Ha9) and *D. polymorphus* (Db2) have high  $\beta$ -glycosidase and  $\beta$ -  
228 xylosidase activities, *Z. bailii* (Zb1) has medium levels, while *S. bacillaris* strains (St1, St2, St5, St8) showed  
229 low levels of enzymatic activities, only a low  $\beta$ -glucosidase activity was exhibited by St1 and St2 strains  
230 and none  $\beta$ -xylosidase whatsoever. Regarding the other technological parameters, high ethanol  
231 tolerance was found in *D. polymorphus* and *Z. bailii*, while *H. uvarum* and *S. bacillaris* strains were more  
232 sensitive to this compound. Only the *D. polymorphus* strain showed a low level of sulphur dioxide  
233 tolerance, while the rest, as expected for non-*Saccharomyces* yeasts, are very sensitive to this chemical.

234 Strains were then tested as mixed starters with a commercial *S. cerevisiae* strain in a defined,  
235 standardized synthetic grape juice that will make easier transcriptomic analysis (see below). In this step,  
236 the fermentative behavior of mixed starter cultures was tested by using two modality of inoculation,  
237 simultaneous and sequential inoculum. The fermentation kinetics, represented by CO<sub>2</sub> release, of mixed  
238 cultures in micro-vinification trials are showed in Fig 1. Regarding simultaneous fermentation (Fig. 1A),  
239 *S. cerevisiae* alone is the fastest one, as expected. Next, all three *S. bacillaris* strains behave in a similar  
240 way, starting fermentation at day 1. The rest of strains have a slower pace, being *H. uvarum* and *D.*  
241 *polymorphus* quite similar. All the simultaneous fermentations were completed in 14 days, without  
242 significant differences among them, except for the mixed fermentation with Zb1+Sc starter, which was  
243 completed in 16 days. At the end of the process, the maximum CO<sub>2</sub> production was found in the  
244 fermentation inoculated with St1+Sc starter (about 13.01 g/100 mL), whereas the lowest amount (about  
245 11.99 g/100 mL) was detected in the fermentation inoculated with Ha9+Sc starter. A similar trend for

246 CO<sub>2</sub> production was observed in sequential fermentations (Fig. 1B), with constant increase in CO<sub>2</sub>  
247 production from the first fermentation day for all non-*Saccharomyces* strains, although clearly slower  
248 than *S. cerevisiae* alone. After the fourth fermentation day, it was observed a high increase of CO<sub>2</sub>  
249 production, as a consequence of the addition of *S. cerevisiae*. The amount of CO<sub>2</sub> produced at the end  
250 of fermentation was similar in all the trials, ranging between 13.91 and 15.17 g/100 ml, with highest  
251 production found for fermentation inoculated with St8+Sc starter. The duration of fermentation was  
252 higher for mixed cultures than for single starter culture; in fact, all the mixed starters completed the  
253 process in 15 days, with similar trend all the trials, whereas fermentation inoculated with pure culture  
254 of *S. cerevisiae* (control fermentation) ends the process at day 11. The evolution of sugar consumption  
255 during the mixed fermentations (Supplementary Fig. S1), reflects the same trend observed for CO<sub>2</sub>  
256 production, as expected.

257         The studies on yeast population dynamics during inoculated fermentation with mixed starter  
258 cultures will help in understanding the interactions between yeast strains (Fig. 2). The persistence level  
259 of non-*Saccharomyces* strains during the mixed fermentations was variable in function of yeast  
260 strain/species and inoculation modality. In fact, in all the fermentations the presence of non-  
261 *Saccharomyces* strains at the end of the process was higher in simultaneous inoculum than sequential  
262 inoculum, except for fermentations inoculated with *H. uvarum* strains, in which no differences between  
263 two modalities of inoculum were found. In mixed fermentations inoculated with *D. polymorphus* strain  
264 (Fig. 2A), in simultaneous modality cells decrease steadily, while in the sequential inoculum, Db2 strain  
265 reached a maximum of yeast cells ( $1.6 \times 10^8$  UFC/mL) in 3 days, after that the viable count decreased  
266 and at the 10th day of the fermentation no *D. polymorphus* cells were found. The evolution of yeast cells  
267 of *H. uvarum* strains (Ha3 in Fig. 2B, Ha9 in Supplementary Figure 2) during the process followed the  
268 same trend in both the inoculum modalities, with a decrease of yeast cells after 4 days of fermentation.  
269 Furthermore, after 10 days of fermentation, no *H. uvarum* colonies were found on plates. In mixed  
270 fermentations with *S. bacillaris* strains (St8 in Fig. 2C, rest in Supplementary Fig. 2), for simultaneous  
271 inoculum a slight increase of cell count was observed in the first two days of fermentations, after that

272 cell count slightly was reduced and at the end of the process a number of viable cells ranging between  
273  $2 \times 10^2$  and  $3.4 \times 10^3$  UFC/mL was found. Regarding fermentations inoculated in sequential modality, for  
274 St8 (Fig. 2C) and St5 (Supplementary Figure 2) strains, in the first days of fermentation a trend similar to  
275 simultaneous inoculum was found, with an increase of viable cells, whereas after the third fermentation  
276 day the number of viable cells decreased and at the end of the process no *S. bacillaris* cells were found.  
277 Regarding mixed fermentation with *Z. bailii* (Figure 2D), in simultaneous inoculum, the number of Zb1  
278 cells remains constant in the first two days of the process, after that a reduction in number of viable  
279 cells was observed, although a number quite high of viable cells was found at the end of the  
280 fermentation ( $6 \times 10^6$  cells/mL). For sequential inoculum, during the first four days, *Z. bailii* cells  
281 increased, after that a high reduction of number of viable cells is observed and in the final wine the  
282 number of *Z. bailii* cells was about  $1 \times 10^5$  cells/mL. As regards the evolution of *S. cerevisiae* EC1118  
283 population in mixed fermentations, similar cell count was observed in both the inoculum modalities and  
284 the evolution of *S. cerevisiae* cells in pure culture, used as control, reflects the typical growth kinetic,  
285 with the presence of high cell number until the end of the fermentations.

### 286 **3.2. Analysis of experimental wines obtained from mixed starter cultures**

287 The experimental wines were analysed for oenological parameters and main volatile compounds  
288 and the data are shown in Tables 2 (simultaneous trials) and 3 (sequential trials). As already reported,  
289 all the starter cultures completed the fermentations. Regarding co-inoculum, all the samples from mixed  
290 fermentations contained an ethanol concentration lower than control sample (Figure 3A), with values  
291 ranging from 11.58 to 12.19 % (v/v), whereas the ethanol content of wine from single fermentation was  
292 12.38 % (v/v). As regards volatile acidity, the activity of non-*Saccharomyces* strains did not increase it;  
293 in fact, the volatile acidity of samples inoculated with mixed starters was lower or very similar to level  
294 detected in control wine, except for the mixed fermentations inoculated with Db2+Sc and Ha3+Sc  
295 starters. The experimental wines were analysed also for the content of volatile compounds usually  
296 present in high quantity in wines, and involved in the wine flavour. The content of acetaldehyde ranged  
297 between 38.72 mg/L (Zb1+Sc) and 65.95 mg/L (Ha9+Sc), being the latter the only case where more

298 acetaldehyde is produced compared with the control. The ethyl acetate was found in concentrations  
299 ranging from 7.71 mg/L (St8+Sc) to 28.95 mg/L (Db2+Sc), with higher levels than the control when *D.*  
300 *polymorphus* and *H. uvarum* were used. Generally, mixed starters produced experimental wines  
301 characterized by lower amount of alcohols (n-propanol, isobutanol, amyl alcohols) than the wine from  
302 *S. cerevisiae* EC1118 strain, used as control, except for n-propanol. The highest difference between  
303 single and mixed starter wines was found for fermentation performed by mixed starter including *S.*  
304 *bacillaris* strains, which contained lower amounts of both D-amyl and isoamyl alcohols than  
305 experimental wine fermented with EC1118 strain.

306 The samples obtained by mixed starter sequentially inoculated with EC1118 strain contained  
307 lower ethanol than control experimental wine, as already found for co-inoculation (Figure 3A). The  
308 lowest level of volatile acidity was found in experimental wine obtained by H9+Sc starter (0.69 mg/L), a  
309 result very surprising as apiculate yeasts are known to be high producers of acetic acid, whereas in the  
310 other samples volatile acidity ranged between 0.91 and 1.18 mg/L. Regarding acetaldehyde, this  
311 compound was detected in the range between 64.38 (Zb1+Sc, well above the control fermentation) and  
312 27.75 mg/L (St1+Sc), whereas the ethyl acetate content ranged from 6.85 mg/L (St1+Sc, below control)  
313 to 28.14 mg/L (Db2+Sc, above control). All mixed cultures produced wines containing slightly higher  
314 amount of n-propanol, than the wine from *S. cerevisiae* strain. Regarding the levels of the other higher  
315 alcohols detected (isobutanol and amyl alcohols), control wine contained higher level of these  
316 compounds than samples from mixed starters. Although these compounds represented the most  
317 abundant groups in all the analysed samples, all the starters produced an amount of high alcohols lower  
318 than 300 mg/L, which is within the acceptable level for these compounds.

319 The ability of mixed starter to reduce the ethanol content was calculated as ratio between ethanol  
320 produced by *S. cerevisiae* pure culture and ethanol produced from each mixed starter (Fig. 3A). All the  
321 mixed starters, in both inoculum modalities, determined an ethanol reduction, as already reported. The  
322 reduction level was higher for simultaneous than for sequential inoculum for all the starters, except  
323 Db2+Sc, in which a slightly higher reduction was found in sequential inoculum. In fermentations using

324 simultaneous inoculations, the ethanol reduction ranged between 0.19 (Ha9+Sc) until 0.80 (Zb1+Sc),  
325 whereas in sequential inoculation the starter ability to reduce the ethanol content ranged between 0.09  
326 (St2+Sc) and 0.45 (St8+Sc).

327 All the parameters determined in the experimental wines were submitted to Principal Component  
328 Analysis (PCA). The plot of all the experimental wines on the plane defined by the first two components  
329 is shown in Fig. 3B. The two principal components, PC1 and PC2, accounted for 58% of the total variance  
330 (36 and 22%, respectively). The PC1 was positively correlated mainly with D-amyl and isoamyl alcohols  
331 and negatively mainly associated with n-propanol, whereas the PC2 was mainly positively related to  
332 content of ethanol and residual fructose and negatively with total acidity and isobutanol. This analysis  
333 allowed to differentiate the experimental wines in function of inoculation modality; in fact, almost all  
334 the samples obtained with non-*Saccharomyces* strains inoculated simultaneously with *S. cerevisiae*  
335 strain are located in upper part of the scatterplot (except St8+Sc and Zb1+Sc, Figure 3B), whereas all the  
336 experimental wines obtained by sequential inoculum are grouped together in the lower part of the  
337 scatterplot. The only exception is represented by the two wines obtained with mixed starter including  
338 *Z. bailii* strain, which were located very near, in both the inoculation modalities. As expected, the  
339 experimental wines obtained with pure culture of EC1118 strain are located in the same quadrant of the  
340 plot. Furthermore, as regards the wines obtained by using the different *S. bacillaris* strains, in both the  
341 inoculation modalities the experimental wine grouped very near and far from the others, with exception  
342 of wine fermented with starter including St8 strain, which was located in a quadrant different from the  
343 wines fermented with mixed starters including St1, St2 and St5.

344

### 345 **3.3. Physiological study of strains of interest**

346 Next, the experiments were focused on two strains, *S. bacillaris* St8 and *Z. bailii* Zb1. These strains  
347 were selected as they determined relatively high ethanol reduction during laboratory scale  
348 fermentations and a big impact in overall metabolites after fermentation (Fig. 3). To further characterize  
349 them, they were tested in different growth conditions (Fig. 4), like different carbon sources (Fig. 4A). In

350 standard, rich, glucose-containing medium YPD, all three strains grow fine, being *Z. bailli* a little bit  
351 slower. Similar results were obtained when sucrose (YPS) was used as carbon source. In such medium,  
352 glucose repression mechanisms can be tested, using a non-metabolizable glucose analog, 2-  
353 deoxyglucose (2DG); in this case a strong repression of growth was observed for *Z. bailli* and also (as  
354 expected) in *S. cerevisiae*. Interestingly enough, *S. bacillaris* is immune to this inhibitor, indicating that  
355 the mechanism of standard catabolite repression does not work for this yeast. When the carbon source  
356 was glycerol, a fully respiratory source, *S. cerevisiae* is the only one that grows well, and the other two  
357 strains struggle. This poor respiration may indicate poor management of oxygen radicals and oxidative  
358 stress sensitivity, but no high differences in tolerance to the oxidant H<sub>2</sub>O<sub>2</sub> were found (Fig. 4B). In fact,  
359 *S. bacillaris* is slightly better equipped to deal with this stress than *S. cerevisiae*. Last, nitrogen sources  
360 were tested. In the standard minimal, ammonium-containing medium SD, all three strains were able to  
361 grow. Ammonium is a rich nitrogen source, but neither in poor proline (SPro), there are no big  
362 differences, although *S. bacillaris* is slightly delayed compared to ammonia.

363 Another tested condition was the growth of the three strains in sugar beet molasses (Fig. 4C), the  
364 media that is used for biomass propagation. In such conditions, *S. cerevisiae* proved to be the fastest  
365 one in terms of growth. Both non-*Saccharomyces* yeasts grow slower and reached a lower OD<sub>600</sub> at  
366 saturation point. However, they assimilate sucrose (that is the main sugar in molasses) well, as it  
367 disappeared for all strains after 24 h (data not shown). Ethanol produced can give us some ideas about  
368 their respiratory metabolism (Fig. 4D). The peak of ethanol was observed early, at the first day, when *S.*  
369 *cerevisiae* produce slightly more ethanol than the other two strains, after that *S. cerevisiae* and *Z. bailli*  
370 consume efficiently ethanol during the postdiauxic phase, while *S. bacillaris* does it more inefficiently,  
371 indicating again that is the one with a more distant phenotype in metabolic terms.

### 372

### 373 **3.4. Molecular analysis of mixed fermentations in synthetic grape juice**

374 Our next goal is to understand the molecular behaviour behind mixed fermentation, analysing  
375 gene expression by transcriptomic analysis and performing biochemical analysis of molecular markers

376 of stress response and nutrient signalling. The goal was to evaluate the impact of the non-conventional  
377 yeasts on *S. cerevisiae*, so simultaneous inoculation was chosen to allow this interaction from the  
378 beginning, plus it induces a bigger ethanol difference (Fig. 3A), but with different inoculation ratios to  
379 have more *S. cerevisiae* biomass for RNA and protein extraction. *S. cerevisiae* was inoculated at  
380 concentration of  $10^6$  cells/ml (higher than before to be able to have enough cells at shorter times), while  
381 *S. bacillaris* and *Z. bailli* were inoculated tenfold to be in excess, at  $10^7$  cells/ml, so there is an initial  
382 excess of non-conventional yeasts, but the amount of *S. cerevisiae* is significant. The overall course of  
383 fermentation was followed by CO<sub>2</sub> production (Fig. 5A) and reducing sugar measurement (Fig. 5B). All  
384 fermentations finished, but the mixed fermentations are complete slightly faster than the one with only  
385 *S. cerevisiae*, probably due to the smaller inoculum of the latter. Again, experimental wines from mixed  
386 fermentation showed lower ethanol as seen in natural grape juice (Fig. 5C). Cells were diluted and spread  
387 in selective media to quantify the evolution of each one (Fig. 5D). *S. bacillaris* grows during the first 24  
388 hours, and at this time *S. cerevisiae* reaches a similar cellular density. From that point, the viable  
389 numbers of *S. bacillaris* decline, and at 144 h there are no detection of this strain, while *S. cerevisiae*  
390 keeps its viability. *Z. bailli* has a different growth profile. It reaches the maximum population level later,  
391 at 48 hours, and then the viability is reduced, but it survives longer than *S. bacillaris* did. *S. cerevisiae*  
392 with *Z. bailli* grows vigorously and remains high, as was seen with *S. bacillaris*. In fact, both have a similar  
393 profile than *S. cerevisiae* alone, so the non-*Saccharomyces* do not offer a serious problem for growth as  
394 previously shown. Supplementary Table S1 shows the final concentration of metabolites of such  
395 fermentations.

396 Samples were taken at day 1, 2 and 3 to extract proteins and to check molecular markers (Fig. 6).  
397 First to check for stress response, the oxidative stress protein peroxiredoxin Tsa1 was detected using a  
398 specific antibody. A positive control was included consisting in cells grown in rich medium YPD and  
399 challenged with oxidative stress in the form of hydrogen peroxide. In those conditions, *S. cerevisiae* and  
400 *Z. bailli* showed a clear induction of the protein, indicating that it is reacting to that stress. However, *S.*  
401 *bacillaris* does not produce a reaction to this antibody, so its Tsa1 is not detected in this experiment. In



402 the fermentation with *S. cerevisiae* alone, Tsa1 goes up until 48 h and then its levels are reduced. As *S.*  
403 *bacillaris* does not give signal, the profile in Sc+Sb (*S. cerevisiae* + *S. bacillaris*) comes only from *S.*  
404 *cerevisiae*. In this case, there is a higher level at longer times, indicating a more stressful environment in  
405 this mixed fermentation. In Sc+Zb (*S. cerevisiae* + *Z. bailii*) fermentation a strong Tsa1 signal was  
406 observed, similar to the oxidative stress cells, so one of them, or both, are in a non-optimal position.  
407 There is an antibody that reacts to sulfinilated Tsa1, indicating a hyperoxidation caused by big stress, but  
408 this response was observed in presence of H<sub>2</sub>O<sub>2</sub>, which is not the case of grape juice fermentation,  
409 indicating that there is not a strong, irreversible oxidative stress during winemaking, including mixed  
410 fermentations. Next, an antibody against the phosphorylated form of AMPK kinase Snf1 was used. That  
411 marks the activity of kinase, due to starvation or stress. In this case, *S. bacillaris* gave also signal, but  
412 with a different size, in the oxidative stress test. *S. cerevisiae* and *Z. bailii* are again very similar. As seen  
413 before (Vallejo et al., 2020), during fermentation, Snf1 is activated very early and its activation decreases  
414 later on, at day 3. In the Sc+Sb mixed fermentation the pattern for *S. cerevisiae* is similar than the single  
415 fermentation, and in the case of *S. bacillaris*' band, the pattern is similar, but it goes down faster, at day  
416 2. In Sc+Zb, both species cannot be discriminated, but the overall pattern is similar, with early induction  
417 and decrease over the next time points. However, an extra band appears suggesting some interactions  
418 causing some event of posttranscriptional modification that is altering Snf1 in possible one of those  
419 strains. Overall, *S. bacillaris* molecular markers are quite distinctive than the other two species.

420

421

### 422 **3.5. Transcriptomic analysis of *S. cerevisiae* under mixed fermentations**

423 Next, a transcriptomic analysis of *S. cerevisiae* gene expression in the presence of the other two  
424 yeast species was carried out, in order to see the common and differential impact of *Z. bailii* and *S.*  
425 *bacillaris*. Considering fermentation advance and growth in synthetic grape juice (Fig. 5), cells were  
426 collected at day 1 of fermentation. At this point, *S. cerevisiae* is actively growing and its gene expression

427 machinery should be functioning at maximum capacity, while non-*Saccharomyces* have been present in  
428 high numbers and also metabolically active, and the amount of all yeasts is similar (Fig. 5D). Three  
429 samples were taken: *Z. bailii*+ *S. cerevisiae*, *S. bacillaris* + *S. cerevisiae* and *S. cerevisiae* alone. *S.*  
430 *cerevisiae* genes levels were compared among the different samples, giving three comparisons,  
431 represented as volcano plots in Fig. 7. At first glance, the presence of *S. bacillaris* (panel 7B) has a bigger  
432 impact on *S. cerevisiae* than *Z. bailii* (panel 7A). Fig. 7C shows the genes that are differentially expressed  
433 between both mixed fermentations. There are 498 *S. cerevisiae* genes upregulated at least two times  
434 in Zb+Sc compared to Sc, and 179 genes downregulated (Supplementary Table S2). Among them, some  
435 functional gene ontology categories of biological processes are overrepresented (Table 4 and  
436 Supplementary Table S3). Many are involved in metabolism, like “de novo’ NAD biosynthetic process  
437 from tryptophan”, “glycolytic process”, “trehalose metabolic process”, “glycogen metabolic process”  
438 and many more devoted to energy production and storage. Therefore, it seems that *Z. bailii* is competing  
439 with *S. cerevisiae* for resources, causing a general activation of metabolism. Of particular interest is the  
440 increase of glycolysis in a fermentative situation. Many glycolytic genes are up-regulated, for instance  
441 all for glyceraldehyde-3-phosphate dehydrogenase isozymes, *TDH1*, *TDH3* and particularly *TDH2*.  
442 Alcohol dehydrogenase I *ADH1* is also activated, so that would mean that *S. cerevisiae* is fully producing  
443 ethanol, so any alcohol reduction is happening at a different level. “Cortical actin cytoskeleton  
444 organization” and “fungal-type cell wall organization” indicate some structural stress in terms of  
445 cytoskeleton and cell wall that have to be compensated. There are 179 genes downregulated 2-fold or  
446 more. No GO category is over-represented among them, probably because 124 of them are of unknown  
447 function, indicating that not so-well defined processes may be in place.

448         The impact of *S. bacillaris* in numerically *S. cerevisiae* is more intense (Fig. 7B). There are 1063 genes  
449 relatively up-regulated compared to the control fermentation. Again, genes involved in hexose  
450 metabolism, glycolysis/gluconeogenesis, are up regulated, suggesting competition for sugars (Table 2).  
451 Many biological function categories are ribosome related, like “rRNA export from nucleus” and  
452 “cytoplasmic translation”, indicating that *S. bacillaris* is inducing an increase in protein synthesis in *S.*

453 *cerevisiae* in a specific way. 1032 genes are downregulated, and interestingly there is overrepresentation  
454 of genes involved in intracellular transport, like “cytoplasm to vacuole transport by the Cvt pathway”,  
455 “protein targeting to vacuole”, “endoplasmic reticulum to Golgi vesicle-mediated transport” and so on.  
456 Therefore, many aspects of the vesicular transport are repressed, so the increase of translation does not  
457 seem to be targeted for secretion or membrane targeting.

458         Next, a direct comparison between *Zb+Sc* and *Sb+Sc* was made (Fig. 7C). This way, the common  
459 effects caused by competition with any yeast will be ruled out, and specific effects will be highlighted.  
460 There are 773 *S. cerevisiae* genes that up-regulated in the presence of *Z. bailii* compared to *St. bacillaris*  
461 (or down-regulated in *St. bacillaris* compared to *Z. bailii*) (Supplementary Table S2). Conversely, there  
462 are 624 genes down-regulated in the presence of *Z. bailii* vs *St. bacillaris*. Regarding GO analysis, among  
463 the categories overrepresented in the up-regulated *S. cerevisiae* genes in the *Zb* vs *Sb* “late nucleophagy”  
464 and “autophagy of mitochondrion” (Supplementary Table S3) are present, including many *ATG* genes  
465 devoted to autophagy. Many of those genes were downregulated in *Sb+ Sc* vs *Sc*, so *S. bacillaris* has the  
466 ability to repress autophagy processes in *S. cerevisiae*. Amino acid metabolic categories as “homoserine  
467 metabolic process”, “cysteine metabolic process” and “methionine biosynthetic process” are also  
468 present in the analysis. Finally, many related categories involving ion transport, particularly iron (iron  
469 ion transmembrane transport, copper ion transport, cellular iron ion homeostasis...) are present. These  
470 involved many siderophores (*ARN1*, *ARN2*, *SIT1*), ferric reductases (*FRE1*, *2,3* and *5*), iron oxidase (*FET3*)  
471 and iron permease (*FTR1*). Siderophore genes are indeed down-regulated in the presence of *S. bacillaris*,  
472 while *Z. bailli* has no effect on them. Interestingly, there are two genes of cell wall mannoproteins  
473 involved in the retention of siderophore-iron in the cell wall, *FIT2* and *FIT3*, that are repressed in the  
474 presence of *S. bacillaris*, but induced in the presence of *Z. bailli*, so they show big differences when data  
475 are compared directly (Fig 7C). It seems that *S. bacillaris* provide an excess of iron in the form of  
476 siderophores that *S. cerevisiae* sense, reducing their mechanisms of uptake. Last, the 624 genes down-  
477 regulated in the presence of *Z. bailli* vs *S. bacillaris* are enriched in genes involved in rRNA metabolism  
478 and translation. The glycolytic genes did not appear in that kind of comparison, so it seems clear that its

479 induction is a common feature in the presence of an alien yeast, probably due to nutrient competition  
480 rather than direct interaction.

481

#### 482 **4. Discussion**

483         Complex ecological interactions happen inside spontaneous grape juice fermentations. In this  
484 work we tried to analyse such information simplifying the interaction between two yeast species in a  
485 standardized growth medium that mimics grape juice, and allow us to perform global analysis, such  
486 transcriptomic studies, and protein analysis in a controlled environment. An initial screen using eight  
487 different strains and two inoculation strategies (simultaneous and sequential) allowed the selection of  
488 strains and conditions. The presence of additional strains other than *S. cerevisiae* always delay  
489 fermentation progression, even from the very beginning, when most nutrients are in theory not  
490 exhausted and without a decrease in *S. cerevisiae* viability (Fig. 2 and 5). Therefore, metabolism should  
491 be affected by the cohabitation with another kind of yeast. Analogous results on the time courses of  
492 sequential fermentations were recently found by several authors. Englezos et al. (Englezos et al., 2019a)  
493 reported that a sequential fermentation with *S. bacillaris* and *S. cerevisiae* in white grape must took 14  
494 days to finish, while 9 days were needed for the single inoculation with *S. cerevisiae*. Although fast and  
495 reliable completion of fermentation are of primary importance in the wine industry, the advantages of  
496 the use of non-*Saccharomyces* yeasts in mixed fermentations is thought to compensate the slower  
497 fermentation with the advantages in wine quality (Hranilovic et al., 2018). Moreover, a slow  
498 fermentation kinetics could be considered as positive for a better retention of volatile compounds  
499 (Medina et al., 2013). Our results confirmed that the use of non-*Saccharomyces* strains affected wine  
500 characteristics; in fact, the experimental wines from mixed starters differed from single starter wine (Fig.  
501 3). In the case of simultaneous inoculum, the wines obtained by using *S. bacillaris* and *Z. bailii* strains  
502 differed more from single starter wine than *H. uvarum* (Fig. 3B). Viability loss could be the cause for *H.*  
503 *uvarum* low impact (Fig. 2). This behaviour could be due to the low competition of these species, which

504 was increased in the case of the delayed inoculation of the *S. cerevisiae* strain, as reported by other  
505 authors for different non-*Saccharomyces* species (Wang et al., 2016) (Gobbi et al., 2014). *H. uvarum* is  
506 more sensitive to death at the end of fermentation than *S. bacillaris* measured with direct *in situ*  
507 fluorescent hybridization (Wang et al., 2014). This phenomenon could have numerous explanations. The  
508 loss of viability of the non-*Saccharomyces* in the mixed fermentations can be related to production of  
509 yeast metabolites, such as ethanol, medium chain fatty acids and acetaldehyde. Direct cell-to-cell  
510 contact has been proved for the pair *S. bacillaris*-*S. cerevisiae* (Englezos et al., 2019b).

511 We have focused on two strains, a *S. bacillaris* and a *Z. bailii* for their deeper impact of  
512 fermentation and higher ethanol reduction (Fig. 3), in order to get a deeper understanding of the  
513 interaction between different yeast species. Both strains were able to reduce the ethanol level of the  
514 wine (Tables 2 and 3), but they are very different regarding other parameters. *S. bacillaris* loses viability  
515 at the end of fermentation much faster than *Z. bailii* during wine fermentation (Figure 2 and 5), it is  
516 insensitive to glucose repression (Fig. 4A) and both are less adapted to respiratory metabolism than *S.*  
517 *cerevisiae* (Fig. 4A). *Z. bailii* viability remains high (Fig. 2), but it is the strain that leads to a slower  
518 fermentation (Fig. 1). Therefore, these strains may induce low ethanol production by similar means or  
519 by mechanisms completely different. Genetically it is known that *S. bacillaris* lies further away than the  
520 two others (Masneuf-Pomarede et al., 2016). Molecular markers of *S. bacillaris* are less similar to *S.*  
521 *cerevisiae* than *Z. bailii* (Fig. 6). Glucose derepression kinase Snf1 is more similar in size between *S.*  
522 *cerevisiae* and *Z. bailii*, while in *S. bacillaris* it is smaller. However, the pattern of induction is quite similar,  
523 although targets may differ. Genomic analysis of two strains of *S. bacillaris* suggests a regulation of the  
524 fermentation/respiration processes that is partially different from that of *S. cerevisiae* (Lemos Junior et  
525 al., 2018), although *SNF1* gene is present. A reason for ethanol reduction could be the respiratory  
526 metabolism of non-*Saccharomyces* yeasts. However, *Z. bailii* has been described as a Crabtree positive  
527 yeast (Rodicio and Heinisch, 2009) and species of *Z. bailii* and *S. bacillaris* have been found to have a  
528 respiratory quotient higher than *S. cerevisiae* (Quirós et al., 2014). Therefore, it seems that those are  
529 not respiratory yeasts that lower ethanol by respiration. The fact that simultaneous fermentations

530 generally lower ethanol more than sequential inoculations (Fig. 3A) may indicate that the main effect of  
531 those yeast is the modulation of *S. cerevisiae* fermentative performance. Therefore, it was important to  
532 see the effect on *S. cerevisiae* transcriptome.

533 The impact of *S. bacillaris* in *S. cerevisiae* transcriptome is more conspicuous than the one of *Z.*  
534 *baillii* (Fig. 7). Interestingly, in the presence of both strains, *S. cerevisiae* increases the transcription of  
535 genes related to hexose metabolism (Table 4), up-regulating most of glycolytic genes. This behaviour  
536 may be seen being in contradiction with an ethanol decrease, but it may indicate that *S. cerevisiae* is  
537 struggling to achieve all the energy required and it is gearing up this pathway. A similar behaviour in  
538 glycolysis transcription has been seen in mixed fermentations with *M. pulcherrima* in aerobic conditions  
539 (Mencher et al., 2021), although this yeast represses also aerobic respiration, unlike the two species  
540 tested in synthetic grape juice fermentation. Stimulation of nutrient consumption seems to be a  
541 common trend in co-cultivation with many non-conventional yeast (Curiel et al., 2017). However, there  
542 are some molecular signatures that may indicate specific ways of regulation of carbon metabolism in  
543 our selected strains. In the presence of *Z. baillii*, *S. cerevisiae* increase significantly the GO categories of  
544 trehalose and glycogen synthesis, inducing the main genes involved in trehalose (trehalose synthase  
545 genes *TPS1*, *TPS2*, *TSL1*, Supplementary Table S2) and glycogen (glycogen synthase genes *GSY1* and  
546 *GSY2*). Genes involved in glycogen degradation like glycogen debranching *GDB1* and glycogen  
547 phosphorylase *GPH1* are also induced, suggesting a potential futile cycle. If *S. cerevisiae* diverts part of  
548 glucose to the accumulation of reserve and stress tolerance polysaccharides, that may reduce the  
549 amount of glucose to be fermented into ethanol. In fact overexpression of trehalose synthesis in wine  
550 yeasts leads to reduction of ethanol (Rossouw et al., 2013). *S. bacillaris* increases in a specific way the  
551 genes of the GO “gluconeogenesis” (Table 4). Those are basically glycolytic genes, but gluconeogenic  
552 specific genes like pyruvate carboxylase *PYC1*, phosphoenolpyruvate carboxykinase *PCK1* and fructose-  
553 1,6-bisphosphatase *FBP1* are up-regulated, and that may be causing two futile cycles that may be  
554 consuming energy with no gain, reducing the ethanol yield per glucose molecule. A common glycolytic  
555 enzyme induced by the two yeasts is the glyceraldehyde 3-phosphate dehydrogenase coded by *TDH1-3*

556 genes. This enzyme has been defined as a cell wall component (ML et al., 2001) and some of its fragments  
557 have been described as antimicrobial peptides against a variety of yeasts (Branco et al., 2014), so it may  
558 be behind death of the non-*Saccharomyces* yeast, particularly *S. bacillaris* by cell-to-cell interactions  
559 (Englezos et al., 2019b).

560 The transcriptomic analysis reveals some specific interactions. For instance, the presence of *S.*  
561 *bacillaris* represses genes involved in iron assimilation. Interestingly genes of siderophores (*ARN1*, *ARN2*,  
562 *SIT1*) and particularly two genes of cell wall mannoproteins involved in the retention of siderophore-  
563 iron in the cell wall, *FIT2* and *FIT3* (Fig. 7C) are among them. In synthetic grape juice there are no  
564 siderophores, and it is known that *S. cerevisiae* do not produce them (Martínez-Pastor and Puig, 2020).  
565 However, it has been reported the acquisition by some *Starmerella* yeasts of a bacterial operon to  
566 synthesize the siderophore enterobactin by horizontal gene transfer (Kominek et al., 2019). The  
567 presence of an excess of siderophore may be detrimental, as an excess of iron could trigger oxidative  
568 stress, so *S. cerevisiae* prevents its import. The upregulation of *S. cerevisiae*'s protein synthesis and down  
569 regulation of vesicular transport by the presence of *S. bacillaris* are indicating a profound rearrangement  
570 of biosynthetic processes that would require a careful and complex analysis.

571

572 **Acknowledgements.** This work was funded by a grant from the Spanish Ministry of Science (AGL2017-  
573 83254-R) to EM and AA. This work was supported by the projects PSR Regione Basilicata 2014-2020,  
574 sottomisura 16.1 GO Vites&Vino PROduktività e Sostenibilità in vitivinicoltura (PROSIT), N. 54250365779  
575 and sottomisura 16.2 IN.VINI.VE.RI.TA.S (Innovare la viti-VINIcoltura lucana: VERso la RIgenerazione  
576 varieTale, la Selezione di vitigni locali e proprietà antiossidanti dei vini), N. 976 to AC. Furthermore, the  
577 JRU MIRRI-IT (<http://www.mirri-it.it/>) is greatly acknowledged for scientific support.

578

579 **Declarations of interest:** none.

580

581

582           **References**

- 583 Benito, Á., Calderón, F., Benito, S., 2019. The influence of non-saccharomyces species on wine  
584           fermentation quality parameters. *Fermentation*. <https://doi.org/10.3390/fermentation5030054>
- 585 Branco, P., Francisco, D., Chambon, C., Hébraud, M., Arneborg, N., Almeida, M.G., Caldeira, J.,  
586           Albergaria, H., 2014. Identification of novel GAPDH-derived antimicrobial peptides secreted by  
587           *Saccharomyces cerevisiae* and involved in wine microbial interactions. *Appl. Microbiol. Biotechnol.*  
588           98, 843–853. <https://doi.org/10.1007/s00253-013-5411-y>
- 589 Capece, A., Romano, P., 2019. Yeasts and Their Metabolic Impact on Wine Flavour BT - Yeasts in the  
590           Production of Wine, in: Romano, P., Ciani, M., Fleet, G.H. (Eds.), . Springer New York, New York, NY,  
591           pp. 43–80. [https://doi.org/10.1007/978-1-4939-9782-4\\_2](https://doi.org/10.1007/978-1-4939-9782-4_2)
- 592 Capece, A., Siesto, G., Poeta, C., Pietrafesa, R., Romano, P., 2013. Indigenous yeast population from  
593           Georgian aged wines produced by traditional “Kakhetian” method. *Food Microbiol.* 36, 447–455.  
594           <https://doi.org/https://doi.org/10.1016/j.fm.2013.07.008>
- 595 Ciani, M., Capece, A., Comitini, F., Canonico, L., Siesto, G., Romano, P., 2016. Yeast Interactions in  
596           Inoculated Wine Fermentation. *Front. Microbiol.* 7, 555.  
597           <https://doi.org/10.3389/fmicb.2016.00555>
- 598 Contreras, A., Hidalgo, C., Schmidt, S., Henschke, P.A., Curtin, C., Varela, C., 2015. The application of  
599           non-Saccharomyces yeast in fermentations with limited aeration as a strategy for the production  
600           of wine with reduced alcohol content. *Int. J. Food Microbiol.* 205, 7–15.  
601           <https://doi.org/10.1016/j.ijfoodmicro.2015.03.027>
- 602 Curiel, J.A., Morales, P., Gonzalez, R., Tronchoni, J., 2017. Different Non-Saccharomyces Yeast Species  
603           Stimulate Nutrient Consumption in *S. cerevisiae* Mixed Cultures . *Front. Microbiol.* .
- 604 De Orduna, R.M., 2010. Climate change associated effects on grape and wine quality and production.  
605           *Food Res. Int.* 43, 1844–1855.



- 606 Englezos, V., Pollon, M., Rantsiou, K., Ortiz-Julien, A., Botto, R., Río Segade, S., Giacosa, S., Rolle, L.,  
607 Cocolin, L., 2019a. *Saccharomyces cerevisiae*-*Starmerella bacillaris* strains interaction modulates  
608 chemical and volatile profile in red wine mixed fermentations. *Food Res. Int.* 122, 392–401.  
609 <https://doi.org/10.1016/j.foodres.2019.03.072>
- 610 Englezos, V., Rantsiou, K., Cravero, F., Torchio, F., Ortiz-Julien, A., Gerbi, V., Rolle, L., Cocolin, L., 2016.  
611 *Starmerella bacillaris* and *Saccharomyces cerevisiae* mixed fermentations to reduce ethanol  
612 content in wine. *Appl. Microbiol. Biotechnol.* 100, 5515–5526. [https://doi.org/10.1007/s00253-](https://doi.org/10.1007/s00253-016-7413-z)  
613 [016-7413-z](https://doi.org/10.1007/s00253-016-7413-z)
- 614 Englezos, V., Rantsiou, K., Giacosa, S., Río Segade, S., Rolle, L., Cocolin, L., 2019b. Cell-to-cell contact  
615 mechanism modulates *Starmerella bacillaris* death in mixed culture fermentations with  
616 *Saccharomyces cerevisiae*. *Int. J. Food Microbiol.* 289, 106–114.  
617 <https://doi.org/10.1016/j.ijfoodmicro.2018.09.009>
- 618 Escott, C., Del Fresno, J.M., Loira, I., Morata, A., Suárez-Lepe, J.A., 2018. *Zygosaccharomyces rouxii*:  
619 Control Strategies and Applications in Food and Winemaking. *Fermentation* 4, 69.
- 620 Fleet, G.H., 1993. *Wine microbiology and biotechnology*. Harwood Academic Publishers, Chur ;  
621 Philadelphia, Pa.
- 622 Gobbi, M., De Vero, L., Solieri, L., Comitini, F., Oro, L., Giudici, P., Ciani, M., 2014. Fermentative aptitude  
623 of non-*Saccharomyces* wine yeast for reduction in the ethanol content in wine. *Eur. Food Res.*  
624 *Technol.* 239, 41–48. <https://doi.org/10.1007/s00217-014-2187-y>
- 625 Gonzalez, R., Quirós, M., Morales, P., 2013. Yeast respiration of sugars by non-*Saccharomyces* yeast  
626 species: A promising and barely explored approach to lowering alcohol content of wines. *Trends*  
627 *Food Sci. Technol.* <https://doi.org/10.1016/j.tifs.2012.06.015>
- 628 Granchi, L., Bosco, M., Messini, A., Vincenzini, M., 1999. Rapid detection and quantification of yeast  
629 species during spontaneous wine fermentation by PCR-RFLP analysis of the rDNA ITS region. *J.*

- 630 Appl. Microbiol. 87, 949–956. <https://doi.org/10.1046/j.1365-2672.1999.00600.x>
- 631 Hranilovic, A., Li, S., Boss, P.K., Bindon, K., Ristic, R., Grbin, P.R., Van der Westhuizen, T., Jiranek, V.,  
632 2018. Chemical and sensory profiling of Shiraz wines co-fermented with commercial non-  
633 *Saccharomyces* inocula. Aust. J. Grape Wine Res. 24, 166–180.  
634 <https://doi.org/https://doi.org/10.1111/ajgw.12320>
- 635 Jolly, N.P., Varela, C., Pretorius, I.S., 2014. Not your ordinary yeast: non-*Saccharomyces* yeasts in wine  
636 production uncovered. FEMS Yeast Res 14, 215–237. <https://doi.org/10.1111/1567-1364.12111>
- 637 Kominek, J., Doering, D.T., Ofulente, D.A., Shen, X.-X., Zhou, X., DeVergilio, J., Hulfachor, A.B.,  
638 Groenewald, M., Mcgee, M.A., Karlen, S.D., Kurtzman, C.P., Rokas, A., Hittinger, C.T., 2019.  
639 Eukaryotic Acquisition of a Bacterial Operon. Cell 176, 1356-1366.e10.  
640 <https://doi.org/https://doi.org/10.1016/j.cell.2019.01.034>
- 641 Lemos Junior, W.J.F., da Silva Duarte, V., Treu, L., Campanaro, S., Nadai, C., Giacomini, A., Corich, V.,  
642 2018. Whole genome comparison of two *Starmerella bacillaris* strains with other wine yeasts  
643 uncovers genes involved in modulating important winemaking traits. FEMS Yeast Res. 18, foy069.
- 644 Lemos Junior, W.J.F., de Oliveira, V.S., Guerra, A.F., Giacomini, A., Corich, V., 2021. From the vineyard to  
645 the cellar: new insights of *Starmerella bacillaris* (synonym *Candida zemplinina*) technological  
646 properties and genomic perspective. Appl. Microbiol. Biotechnol. 105, 493–501.  
647 <https://doi.org/10.1007/s00253-020-11041-9>
- 648 Love, M.I., Huber, W., Anders, S., 2014. Moderated estimation of fold change and dispersion for RNA-  
649 seq data with DESeq2. Genome Biol. 15, 550. <https://doi.org/10.1186/s13059-014-0550-8>
- 650 Manzanares, P., Ramón, D., Querol, A., 1999. Screening of non-*Saccharomyces* wine yeasts for the  
651 production of  $\beta$ -D-xylosidase activity. Int. J. Food Microbiol. 46, 105–112.  
652 [https://doi.org/https://doi.org/10.1016/S0168-1605\(98\)00186-X](https://doi.org/https://doi.org/10.1016/S0168-1605(98)00186-X)
- 653 Manzanares, P., Rojas, V., Genovés, S., Vallés, S., 2000. A preliminary search for anthocyanin- $\beta$ -D-

- 654 glucosidase activity in non-Saccharomyces wine yeasts. *Int. J. Food Sci. Technol.* 35, 95–103.
- 655 <https://doi.org/https://doi.org/10.1046/j.1365-2621.2000.00364.x>
- 656 Martin, V., Valera, M.J., Medina, K., Boido, E., Carrau, F., 2018. Oenological Impact of the
- 657 *Hanseniaspora/Kloeckera* Yeast Genus on Wines—A Review. *Fermentation* 4, 76.
- 658 Martínez-Pastor, M.T., Puig, S., 2020. Adaptation to iron deficiency in human pathogenic fungi. *Biochim.*
- 659 *Biophys. Acta - Mol. Cell Res.* 1867, 118797.
- 660 <https://doi.org/https://doi.org/10.1016/j.bbamcr.2020.118797>
- 661 Masneuf-Pomarede, I., Bely, M., Marullo, P., Albertin, W., 2016. The Genetics of Non-conventional Wine
- 662 Yeasts: Current Knowledge and Future Challenges. *Front. Microbiol.* 6, 1563.
- 663 <https://doi.org/10.3389/fmicb.2015.01563>
- 664 Medina, K., Boido, E., Dellacassa, E., Carrau, F., 2012. Growth of non-Saccharomyces yeasts affects
- 665 nutrient availability for *Saccharomyces cerevisiae* during wine fermentation. *Int. J. Food Microbiol.*
- 666 157, 245–250. <https://doi.org/10.1016/j.ijfoodmicro.2012.05.012>
- 667 Medina, K., Boido, E., Farina, L., Gioia, O., Gomez, M.E., Barquet, M., Gaggero, C., Dellacassa, E., Carrau,
- 668 F., 2013. Increased flavour diversity of Chardonnay wines by spontaneous fermentation and co-
- 669 fermentation with *Hanseniaspora vineae*. *Food Chem* 141, 2513–2521.
- 670 <https://doi.org/10.1016/j.foodchem.2013.04.056>
- 671 Mencher, A., Morales, P., Curiel, J.A., Gonzalez, R., Tronchoni, J., 2021. *Metschnikowia pulcherrima*
- 672 represses aerobic respiration in *Saccharomyces cerevisiae* suggesting a direct response to co-
- 673 cultivation. *Food Microbiol.* 94, 103670. <https://doi.org/10.1016/j.fm.2020.103670>
- 674 Mi, H., Muruganujan, A., Ebert, D., Huang, X., Thomas, P.D., 2019. PANTHER version 14: more genomes,
- 675 a new PANTHER GO-slim and improvements in enrichment analysis tools. *Nucleic Acids Res.* 47,
- 676 D419–D426. <https://doi.org/10.1093/nar/gky1038>
- 677 Milanovic, V., Ciani, M., Oro, L., Comitini, F., 2012. *Starmerella bombicola* influences the metabolism of

- 678 Saccharomyces cerevisiae at pyruvate decarboxylase and alcohol dehydrogenase level during  
679 mixed wine fermentation. *Microb. Cell Fact.* 11, 18. <https://doi.org/10.1186/1475-2859-11-18>
- 680 ML, D., JE, O., Azori, N.I., Renau-Piqueras, J., ML, G., Gozalbo, D., 2001. The glyceraldehyde-3-phosphate  
681 dehydrogenase polypeptides encoded by the Saccharomyces cerevisiae TDH1, TDH2 and TDH3  
682 genes are also cell wall proteins. *Microbiology* 147, 411–417.
- 683 Nissen, P., Nielsen, D., Arneborg, N., 2003. Viable Saccharomyces cerevisiae cells at high concentrations  
684 cause early growth arrest of non-Saccharomyces yeasts in mixed cultures by a cell-cell contact-  
685 mediated mechanism. *Yeast* 20, 331–341. <https://doi.org/10.1002/yea.965>
- 686 Orlova, M., Barrett, L., Kuchin, S., 2008. Detection of endogenous Snf1 and its activation state:  
687 application to Saccharomyces and Candida species. *Yeast* 25, 745–754.  
688 <https://doi.org/10.1002/yea.1628>
- 689 Padilla, B., Gil, J. V., Manzanares, P., 2016. Past and Future of Non-Saccharomyces Yeasts: From Spoilage  
690 Microorganisms to Biotechnological Tools for Improving Wine Aroma Complexity. *Front. Microbiol.*  
691 7. <https://doi.org/10.3389/fmicb.2016.00411>
- 692 Patro, R., Duggal, G., Love, M.I., Irizarry, R.A., Kingsford, C., 2017. Salmon provides fast and bias-aware  
693 quantification of transcript expression. *Nat. Methods* 14, 417–419.  
694 <https://doi.org/10.1038/nmeth.4197>
- 695 Pérez-Torrado, R., Gamero, E., Gómez-Pastor, R., Garre, E., Aranda, A., Matallana, E., 2015. Yeast  
696 biomass, an optimised product with myriad applications in the food industry. *Trends Food Sci.*  
697 *Technol.* 46, 167–175. <https://doi.org/http://dx.doi.org/10.1016/j.tifs.2015.10.008>
- 698 Petruzzi, L., Capozzi, V., Berbegal, C., Corbo, M.R., Bevilacqua, A., Spano, G., Sinigaglia, M., 2017.  
699 Microbial Resources and Enological Significance: Opportunities and Benefits. *Front. Microbiol.* 8,  
700 995. <https://doi.org/10.3389/fmicb.2017.00995>
- 701 Quirós, M., Rojas, V., Gonzalez, R., Morales, P., 2014. Selection of non-Saccharomyces yeast strains for

- 702 reducing alcohol levels in wine by sugar respiration. *Int. J. Food Microbiol.*
- 703 <https://doi.org/10.1016/j.ijfoodmicro.2014.04.024>
- 704 Renault, P.E., Albertin, W., Bely, M., 2013. An innovative tool reveals interaction mechanisms among
- 705 yeast populations under oenological conditions. *Appl. Microbiol. Biotechnol.* 97, 4105–4119.
- 706 <https://doi.org/10.1007/s00253-012-4660-5>
- 707 Ribéreau-Gayon, P., Dubourdieu, D., Donèche, B., 2006. *Handbook of enology*, 2nd ed. John Wiley,
- 708 Chichester, West Sussex, England ; Hoboken, NJ.
- 709 Rodicio, R., Heinisch, J.J., 2009. Sugar Metabolism by *Saccharomyces* and non-*Saccharomyces* Yeasts BT
- 710 - Biology of Microorganisms on Grapes, in Must and in Wine, in: König, H., Uden, G., Fröhlich, J.
- 711 (Eds.), . Springer Berlin Heidelberg, Berlin, Heidelberg, pp. 113–134. [https://doi.org/10.1007/978-](https://doi.org/10.1007/978-3-540-85463-0_6)
- 712 [3-540-85463-0\\_6](https://doi.org/10.1007/978-3-540-85463-0_6)
- 713 Rossouw, D., Heyns, E.H., Setati, M.E., Bosch, S., Bauer, F.F., 2013. Adjustment of Trehalose Metabolism
- 714 in Wine *Saccharomyces cerevisiae* Strains To Modify Ethanol Yields. *Appl. Environ. Microbiol.* 79,
- 715 5197–5207. <https://doi.org/10.1128/aem.00964-13>
- 716 Roudil, L., Russo, P., Berbegal, C., Albertin, W., Spano, G., Capozzi, V., 2019. Non-*Saccharomyces*
- 717 Commercial Starter Cultures: Scientific Trends, Recent Patents and Innovation in the Wine Sector.
- 718 *Recent Pat. Food. Nutr. Agric.* <https://doi.org/10.2174/2212798410666190131103713>
- 719 Torrellas, M., Rozès, N., Aranda, A., Matallana, E., 2020. Basal catalase activity and high glutathione
- 720 levels influence the performance of non-*Saccharomyces* active dry wine yeasts. *Food Microbiol.*
- 721 <https://doi.org/10.1016/j.fm.2020.103589>
- 722 Vallejo, B., Matallana, E., Aranda, A., 2020. *Saccharomyces cerevisiae* nutrient signaling pathways show
- 723 an unexpected early activation pattern during winemaking. *Microb. Cell Fact.*
- 724 <https://doi.org/10.1186/s12934-020-01381-6>
- 725 Wang, C., Esteve-Zarzoso, B., Mas, A., 2014. Monitoring of *Saccharomyces cerevisiae*, *Hanseniaspora*

726 uvarum, and *Starmerella bacillaris* (synonym *Candida zemplinina*) populations during alcoholic  
727 fermentation by fluorescence in situ hybridization. *Int. J. Food Microbiol.* 191, 1–9.  
728 [https://doi.org/https://doi.org/10.1016/j.ijfoodmicro.2014.08.014](https://doi.org/10.1016/j.ijfoodmicro.2014.08.014)

729 Wang, C., Mas, A., Esteve-Zarzoso, B., 2016. The Interaction between *Saccharomyces cerevisiae* and  
730 Non-*Saccharomyces* Yeast during Alcoholic Fermentation Is Species and Strain Specific . *Front.*  
731 *Microbiol.* .

732 Zhu, X., Navarro, Y., Mas, A., Torija, M.-J., Beltran, G., 2020. A Rapid Method for Selecting Non-  
733 *Saccharomyces* Strains with a Low Ethanol Yield. *Microorg.* .  
734 <https://doi.org/10.3390/microorganisms8050658>

735

736

737

738

739

740

#### 741 **Figure legends**

742 Fig. 1. Fermentation kinetics of mixed starters cultures of *D. polymorphus* (Db2), *H. uvarum* (Ha3 and  
743 Ha9), *S. bacillaris* (St1, St8, St2 and St5) and *Z. bailii* (Zb1) strains simultaneously A) or sequentially B)  
744 inoculated with *S. cerevisiae* EC1118 (Sc). Pure culture of *S. cerevisiae* EC1118 (Control Sc) was used as  
745 a control. Data are means  $\pm$  standard deviation of two independent experiments.

746

747 Fig. 2. Evolution of yeast populations in mixed fermentations inoculated with *S. cerevisiae* (Sc) and *D.*  
748 *polymorphus* (Db2, A)), *H. uvarum* (Ha3, B)), *S. bacillaris* (St8, C)) and *Z. bailii* (Zb1, D)) in simultaneous

749 and sequential modalities. Values are mean of two independent duplicates. Pure culture of *S. cerevisiae*  
750 EC1118 (Control Sc) was used as a control. \* indicate the inoculation time of *S. cerevisiae*.

751

752 Fig. 3. Metabolite analysis of mixed fermentations. A) Starter ability to reduce the ethanol content in  
753 experimental wines obtained by simultaneous (green) and sequential (orange) inoculation as ratio  
754 between ethanol produced by *S. cerevisiae* pure culture and ethanol produced from each mixed starter.  
755 B) Principal component analysis (PCA) biplot of the oenological parameters and main volatile  
756 compounds detected in experimental wines obtained by simultaneous (SiF) (black) and sequential (SeF)  
757 (red) inoculum of selected non-*Saccharomyces* strains. Pure culture of *S. cerevisiae* EC1118 (Control Sc)  
758 was used as control.

759

760 Fig. 4. Physiological study of strains of interest. A) Spot analysis of growth on different carbon and  
761 nitrogen sources. *Z. bailii* (Zb), *S. bacillaris* (Sb) and *S. cerevisiae* (Sc) strains were grown overnight in  
762 YPD liquid to stationary phase, serial dilutions were made and 5 µl drops were spotted in YPD, YPS  
763 (sucrose), YPS containing 200 ng/ml 2-deoxyglucose (2DG), YPG (glycerol), SD (minimal medium with  
764 ammonium as sole nitrogen source), SPro (minimal medium with proline as sole nitrogen source). B)  
765 Oxidative analysis of those strains. Overnight cultures from YPD were plated on YPD plates and a paper  
766 circle containing 5 µl drops of hydrogen peroxide was placed in the middle. Inhibition halos were  
767 measured the next day. Experiments were carried in triplicate and mean and standard deviation is  
768 shown. C) Growth in beet molasses followed by OD<sub>600</sub> measurement. D) Ethanol measurement from the  
769 growth curve showed in panel C). Experiments carried out in triplicates and average and standard  
770 deviation is shown.

771

772 Fig. 5. Mixed fermentation of selected strains for molecular analysis. *S. cerevisiae* (Sc) alone and mixed  
773 fermentations with *S. bacillaris* (Sb+Sc) or *Z. bailii* (Zb+Sc) were carried out in synthetic grape juice. A)

774 Weight loss of the fermentation. B) Reducing sugars during fermentation. C) Ethanol production at the  
775 end of fermentation. D) Cell viability during fermentation.

776

777 Fig. 6. Western blot analysis of peroxirredoxin Tsa1 and glucose repression kinase Snf1 during mixed  
778 fermentations. Samples from 1, 2 and 3 days of the fermentation described in Fig. 5 were taken and  
779 proteins extracted. A control of oxidative stress was made in cells growing exponentially in YPD  
780 challenged with 5 mM H<sub>2</sub>O<sub>2</sub> for 30 min. Blots with the same amount of proteins were blotted and probed  
781 with anti-Tsa1, anti- Tsa1-SO<sub>3</sub> and Snf1-P specific antibodies. Actin was used as loading control.

782

783 Fig. 7. Transcriptomic analysis of mixed fermentations. Volcano plot of: A) *Z.bailii* + *S. cerevisiae*  
784 fermentation vs *S. cerevisiae* alone control. B) *S. bacillaris*+ *S. cerevisiae* fermentation vs *S. cerevisiae*  
785 alone control. C) *Z.bailii* + *S.cerevisiae* fermentation vs *S. bacillaris*+ *S. cerevisiae* fermentation. Log<sub>2</sub> of  
786 fold change and log<sub>2</sub> of p-value were plotted.

787

788

789

790

791

792

793

794



795 **Table 1.** Main technological characteristics of the selected non-*Saccharomyces* strains.

| Strain code | Quantitative enzymatic activities |                             | EtOH <sup>(b)</sup> | SO <sub>2</sub> <sup>(b)</sup> |
|-------------|-----------------------------------|-----------------------------|---------------------|--------------------------------|
|             | β-glucosidase <sup>(a)</sup>      | β-xylosidase <sup>(a)</sup> |                     |                                |
| Db2         | 157.162 ± 25.98                   | 108.182 ± 20.20             | 0.43 ± 0.07         | 0.11 ± 0.01                    |
| Ha3         | 116.345 ± 14.43                   | 106.141 ± 5.77              | 0.04 ± 0.00         | 0.01 ± 0.00                    |
| Ha9         | 177.570 ± 14.43                   | 51.039 ± 2.89               | 0.06 ± 0.01         | 0.01 ± 0.00                    |
| St1         | 26.550 ± 8.66                     | 0.00 ± 0.00                 | 0.09 ± 0.01         | 0.03 ± 0.00                    |
| St2         | 8.182 ± 5.77                      | 0.00 ± 0.00                 | 0.08 ± 0.01         | 0.02 ± 0.00                    |
| St5         | 0.00 ± 0.00                       | 0.00 ± 0.00                 | 0.08 ± 0.02         | 0.03 ± 0.01                    |
| St8         | 0.00 ± 0.00                       | 0.00 ± 0.00                 | 0.08 ± 0.00         | 0.02 ± 0.00                    |
| Zb1         | 83.692 ± 8.66                     | 22.468 ± 8.66               | 0.62 ± 0.05         | 0.03 ± 0.00                    |

796 <sup>a</sup>Enzymatic activities reported as nmol pNP/mL/h

797 <sup>b</sup>Strain tolerance to ethanol and SO<sub>2</sub>, expressed as the ratio between the growth in broth with (14% v/v  
798 ethanol and 150 mg/L SO<sub>2</sub>) and without the stress factor.

799

800

801

802

803

804

805

806

807

808

809 **Table 2.** Oenological parameters and main volatile compounds of experimental wines obtained from mixed starters cultures of selected non-*Saccharomyces* strains (Db2,  
 810 Ha3, Ha9, St1, St8, St2, St5 and Zb1) simultaneously inoculated with *S. cerevisiae* EC1118 (Sc). Pure culture of *S. cerevisiae* EC1118 (Control Sc) was used as control.

| Oenological characteristics | Db2+Sc                    | Ha3+Sc                    | Ha9+Sc                   | St1+Sc                   | St2+Sc                   | St5+Sc                   | St8+Sc                   | Zb1+Sc                   | Control (Sc)              |
|-----------------------------|---------------------------|---------------------------|--------------------------|--------------------------|--------------------------|--------------------------|--------------------------|--------------------------|---------------------------|
| Ethanol                     | 12.09±0.07 <sup>ab</sup>  | 11.96±0.01 <sup>ab</sup>  | 12.19±0.02 <sup>ac</sup> | 11.84±0.06 <sup>ab</sup> | 11.91±0.23 <sup>ab</sup> | 11.93±0.21 <sup>ab</sup> | 11.81±0.18 <sup>bc</sup> | 11.58±0.20 <sup>b</sup>  | 12.38±0.05 <sup>a</sup>   |
| Fructose                    | 2.40±0.14 <sup>ab</sup>   | 2.45±0.21 <sup>b</sup>    | 2.20±0.14 <sup>ab</sup>  | 1.40±0.28 <sup>c</sup>   | 1.45±0.07 <sup>c</sup>   | 1.40±0.14 <sup>c</sup>   | 1.40±0.14 <sup>c</sup>   | 1.80±0.00 <sup>ac</sup>  | 1.80±0.14 <sup>ac</sup>   |
| Glucose                     | 1.50±0.00 <sup>a</sup>    | 1.40±0.00 <sup>a</sup>    | 1.55±0.07 <sup>a</sup>   | 0.90±0.00 <sup>a</sup>   | 1.05±0.07 <sup>a</sup>   | 0.85±0.21 <sup>a</sup>   | 1.05±0.07 <sup>a</sup>   | 5.70±0.71 <sup>b</sup>   | 1.45±0.07 <sup>a</sup>    |
| Total acidity               | 5.22±0.14 <sup>ac</sup>   | 5.37±0.00 <sup>a</sup>    | 5.15±0.16 <sup>ac</sup>  | 4.89±0.01 <sup>c</sup>   | 5.00±0.11 <sup>ac</sup>  | 5.13±0.15 <sup>ac</sup>  | 5.18±0.08 <sup>ac</sup>  | 6.00±0.03 <sup>b</sup>   | 5.02±0.01 <sup>ac</sup>   |
| Volatile acidity            | 1.13±0.06 <sup>a</sup>    | 0.88±0.04 <sup>b</sup>    | 0.71±0.00 <sup>bc</sup>  | 0.68±0.04 <sup>cd</sup>  | 0.61±0.03 <sup>c</sup>   | 0.65±0.02 <sup>c</sup>   | 0.83±0.02 <sup>bd</sup>  | 0.68±0.12 <sup>bc</sup>  | 0.86±0.01 <sup>bd</sup>   |
| Acetaldehyde                | 48.22±11.25 <sup>ab</sup> | 43.51±14.59 <sup>ab</sup> | 65.95±5.28 <sup>a</sup>  | 29.26±0.30 <sup>b</sup>  | 30.62±2.76 <sup>bc</sup> | 32.76±4.40 <sup>bc</sup> | 25.13±4.16 <sup>b</sup>  | 38.72±7.91 <sup>ab</sup> | 59.36±4.16 <sup>ac</sup>  |
| Ethyl acetate               | 28.95±9.45 <sup>a</sup>   | 11.84±3.59 <sup>ab</sup>  | 17.44±5.66 <sup>ab</sup> | 7.91±0.31 <sup>b</sup>   | 8.07±1.42 <sup>b</sup>   | 9.02±1.85 <sup>b</sup>   | 7.71±2.80 <sup>b</sup>   | 9.12±1.07 <sup>b</sup>   | 7.38±3.39 <sup>ab</sup>   |
| <i>n</i> -Propanol          | 23.06±4.62                | 19.67±2.12                | 22.01±4.29               | 21.15±2.36               | 25.64±4.07               | 29.74±3.34               | 29.52±5.52               | 18.91±0.46               | 19.83±1.44                |
| Isobutanol                  | 19.22±0.42 <sup>ab</sup>  | 21.32±0.61 <sup>ab</sup>  | 18.69±2.83 <sup>ab</sup> | 25.07±0.04 <sup>ab</sup> | 19.91±1.47 <sup>ab</sup> | 15.51±1.90 <sup>a</sup>  | 17.86±2.12 <sup>a</sup>  | 36.93±12.96 <sup>b</sup> | 28.01±2.53 <sup>ab</sup>  |
| D-amyl alcohol              | 38.52±1.01 <sup>a</sup>   | 36.80±0.46 <sup>ab</sup>  | 36.39±1.20 <sup>ab</sup> | 25.24±0.71 <sup>ab</sup> | 23.74±2.50 <sup>b</sup>  | 24.3±2.80 <sup>b</sup>   | 13.04±9.05 <sup>b</sup>  | 35.14±1.08 <sup>a</sup>  | 40.12±0.77 <sup>a</sup>   |
| Isoamyl alcohol             | 96.41±8.22 <sup>a</sup>   | 91.70±0.98 <sup>a</sup>   | 95.48±5.62 <sup>a</sup>  | 53.34±2.26 <sup>b</sup>  | 51.51±6.21 <sup>b</sup>  | 47.91±2.28 <sup>b</sup>  | 49.86±1.85 <sup>b</sup>  | 87.59±3.54 <sup>ac</sup> | 104.04±2.32 <sup>ac</sup> |

811 Data are means ± standard deviation of two independent experiments. Different superscript letters in the same row correspond to statistically significant differences  
 812 (Tukey's test,  $p < 0.05$ ) between mixed and control fermentation. The oenological parameters are expressed as g/L, with exception of ethanol, expressed as % v/v; volatile  
 813 compounds are expressed as mg/L.

814

815 **Table 3.** Oenological parameters and main volatile compounds of experimental wines obtained from mixed starters cultures of selected non-*Saccharomyces* strains (Db2,  
816 Ha3, Ha9, St1, St8, St2, St5 and Zb1) sequentially inoculated with *S. cerevisiae* EC1118 (Sc). Pure culture of *S. cerevisiae* EC1118 (Control Sc) was used as control.

| Oenological characteristics | Db2+Sc                    | Ha3+Sc                   | Ha9+Sc                    | St1+Sc                   | St2+Sc                   | St5+Sc                   | St8+Sc                   | Zb1+Sc                    | Control (Sc)             |
|-----------------------------|---------------------------|--------------------------|---------------------------|--------------------------|--------------------------|--------------------------|--------------------------|---------------------------|--------------------------|
| Ethanol                     | 11.46±0.08 <sup>a</sup>   | 11.61±0.07 <sup>a</sup>  | 11.66±0.05 <sup>a</sup>   | 11.37±0.01 <sup>ab</sup> | 11.70±0.13 <sup>a</sup>  | 11.54±0.09 <sup>a</sup>  | 11.34±0.13 <sup>ab</sup> | 11.53±0.00 <sup>a</sup>   | 11.79±0.20 <sup>a</sup>  |
| Fructose                    | 2.00±0.14 <sup>ab</sup>   | 1.45±0.07 <sup>a</sup>   | 1.40±0.00 <sup>a</sup>    | 1.35±0.07 <sup>a</sup>   | 1.45±0.21 <sup>a</sup>   | 1.35±0.07 <sup>a</sup>   | 1.40±0.00 <sup>a</sup>   | 1.75±0.07 <sup>a</sup>    | 2.80±0.71 <sup>b</sup>   |
| Glucose                     | 2.10±0.00 <sup>ad</sup>   | 1.05±0.07 <sup>bd</sup>  | 1.15±0.07 <sup>bc</sup>   | 1.10±0.14 <sup>bd</sup>  | 1.05±0.35 <sup>bd</sup>  | 1.00±0.14 <sup>bd</sup>  | 0.95±0.07 <sup>bd</sup>  | 1.80±0.28 <sup>ac</sup>   | 1.70±0.14 <sup>cd</sup>  |
| Total acidity               | 5.70±0.06 <sup>ab</sup>   | 5.88±0.03 <sup>ac</sup>  | 5.98±0.03 <sup>ac</sup>   | 5.35±0.16 <sup>bd</sup>  | 5.73±0.12 <sup>ab</sup>  | 5.52±0.03 <sup>ad</sup>  | 5.78±0.25 <sup>ab</sup>  | 6.30±0.09 <sup>c</sup>    | 5.18±0.12 <sup>d</sup>   |
| Volatile acidity            | 1.18±0.01 <sup>a</sup>    | 1.03±0.04 <sup>ac</sup>  | 0.69±0.01 <sup>b</sup>    | 0.88±0.06 <sup>c</sup>   | 0.97±0.04 <sup>c</sup>   | 1.17±0.01 <sup>ad</sup>  | 1.16±0.01 <sup>ad</sup>  | 0.91±0.10 <sup>c</sup>    | 0.99±0.05 <sup>cd</sup>  |
| Acetaldehyde                | 46.26±3.92 <sup>ab</sup>  | 48.42±8.63 <sup>ab</sup> | 33.11±3.61 <sup>a</sup>   | 27.75±0.28 <sup>a</sup>  | 39.46±1.31 <sup>a</sup>  | 38.32±10.33 <sup>a</sup> | 42.96±6.36 <sup>ab</sup> | 64.38±2.09 <sup>b</sup>   | 39.25±2.85 <sup>a</sup>  |
| Ethyl acetate               | 28.14±6.98 <sup>a</sup>   | 13.45±0.33 <sup>bc</sup> | 17.81±2.33 <sup>c</sup>   | 6.85±0.20 <sup>b</sup>   | 6.91±0.06 <sup>b</sup>   | 8.43±0.44 <sup>bc</sup>  | 8.88±1.17 <sup>bc</sup>  | 9.97±0.01 <sup>bc</sup>   | 10.09±1.29 <sup>bc</sup> |
| <i>n</i> -Propanol          | 28.54±0.78 <sup>ab</sup>  | 28.68±0.37 <sup>ab</sup> | 31.76±2.16 <sup>b</sup>   | 22.73±3.34 <sup>a</sup>  | 22.33±3.34 <sup>a</sup>  | 24.74±0.73 <sup>ab</sup> | 20.69±2.24 <sup>a</sup>  | 22.13±2.83 <sup>a</sup>   | 20.24±0.67 <sup>a</sup>  |
| Isobutanol                  | 29.70±0.51                | 26.24±1.06               | 30.91±8.37                | 33.14±0.07               | 33.07±8.64               | 23.46±0.34               | 24.38±0.32               | 32.80±4.00                | 32.15±2.08               |
| amyl alcohol                | 40.78±2.70 <sup>ac</sup>  | 43.50±0.50 <sup>a</sup>  | 46.81±4.65 <sup>a</sup>   | 29.46±5.72 <sup>bc</sup> | 27.06±0.50 <sup>b</sup>  | 33.13±0.53 <sup>bd</sup> | 33.39±3.10 <sup>bd</sup> | 42.27±2.70 <sup>ad</sup>  | 48.53±0.39 <sup>a</sup>  |
| Isoamyl alcohol             | 102.66±0.14 <sup>ab</sup> | 94.42±2.55 <sup>ab</sup> | 104.50±1.07 <sup>ab</sup> | 80.75±12.44 <sup>a</sup> | 79.04±21.57 <sup>a</sup> | 82.30±6.57 <sup>a</sup>  | 83.04±9.35 <sup>a</sup>  | 115.62±7.14 <sup>ab</sup> | 127.23±2.59 <sup>b</sup> |

817 Data are means ± standard deviation of two independent experiments. Different superscript letters in the same row correspond to statistically significant differences  
818 (Tukey's test,  $p < 0.05$ ) between mixed and control fermentation. The oenological parameters are expressed as g/L, with exception of ethanol, expressed as % v/v; volatile  
819 compounds are expressed as mg/L

820

821

822

823 **Table 4.** Main Biological Process GO categories over-represented in mixed fermentations. See Supplementary Table S3

824 for a full analysis.

| Fermentation                          | GO categories                                     | Fold enrichment |
|---------------------------------------|---------------------------------------------------|-----------------|
| <b>Zb+Sc vs Sc, up-regulated</b>      | 'de novo' NAD biosynthetic process                | 13,91           |
|                                       | glycolytic process                                | 10.43           |
|                                       | trehalose metabolic process                       | 9.48            |
|                                       | glycogen metabolic process                        | 5.62            |
| <b>Zb+Sc vs Sc, down-regulated</b>    | None                                              |                 |
| <b>Sb+Sc vs Sc, up-regulated</b>      | gluconeogenesis (GO:0006094)                      | 7.62            |
|                                       | rRNA transport                                    | 6.38            |
|                                       | cytoplasmic translation                           | 5.38            |
| <b>Sb+Sc vs Sc, down-regulated</b>    | cytoplasm to vacuole transport by the Cvt pathway | 4.11            |
|                                       | protein targeting to vacuole                      | 2.92            |
| <b>Zb+Sc vs Sb+Sc, up-regulated</b>   | late nucleophagy                                  | 7.01            |
|                                       | homoserine metabolic process                      | 6.95            |
|                                       | iron ion transmembrane transport                  | 6.95            |
| <b>Zb+Sc vs Sb+Sc, down-regulated</b> | rRNA export from nucleus                          | 9.62            |
|                                       | cytoplasmic translation                           | 8.61            |

825

826

Fig. 1

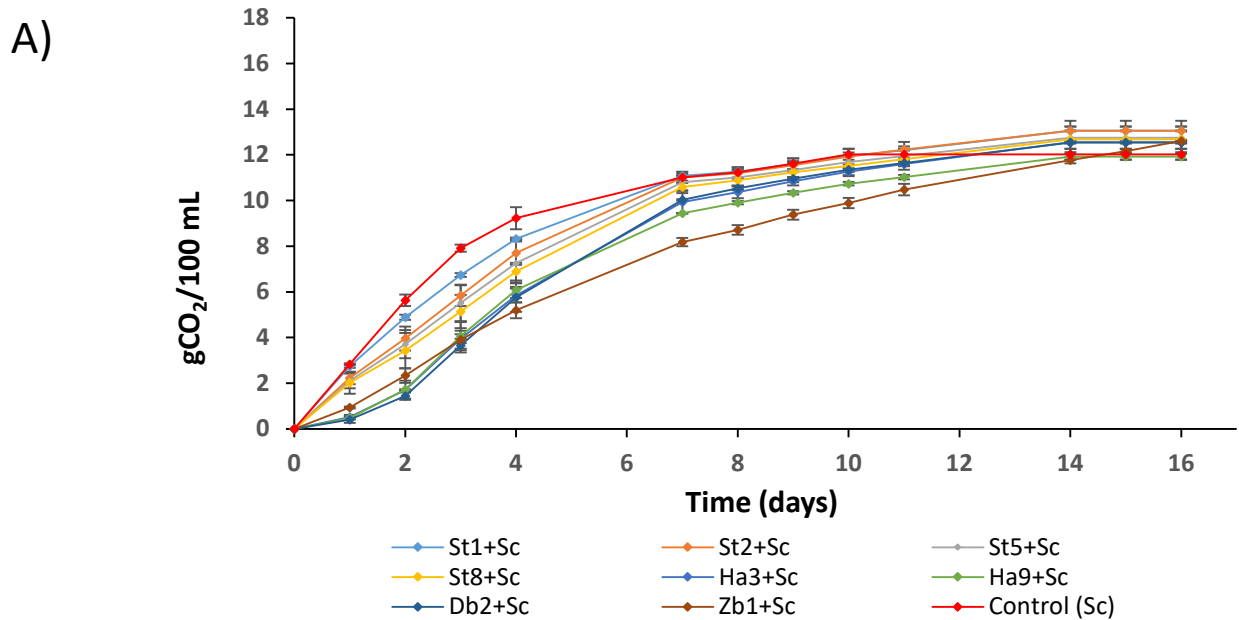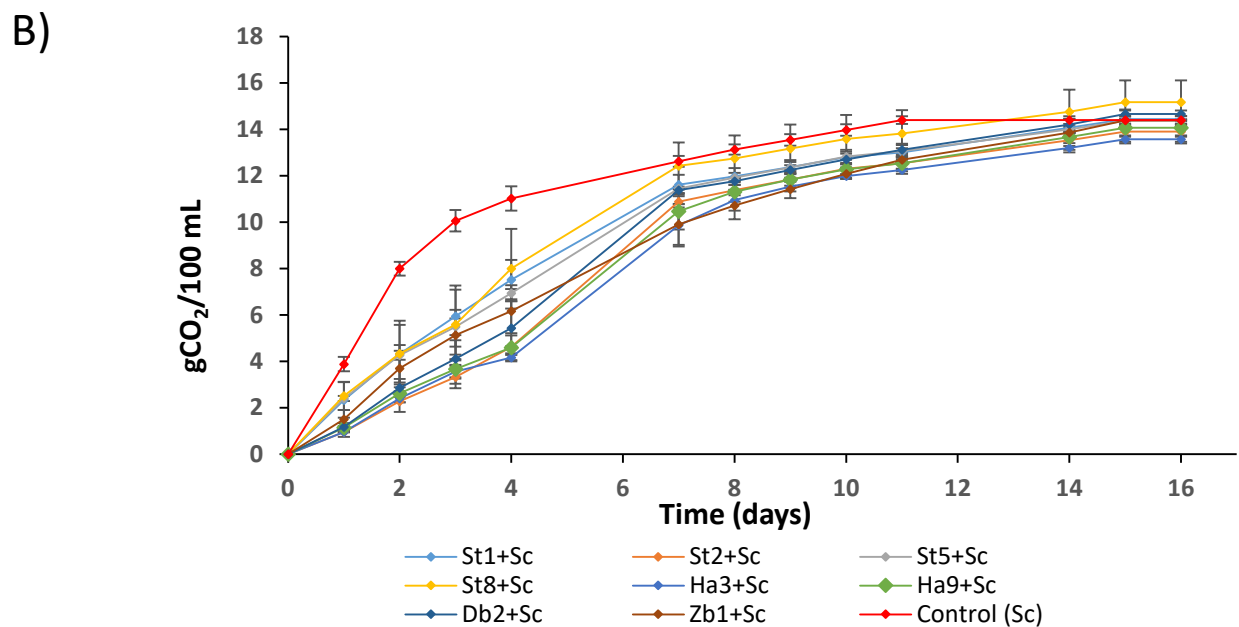

A)

Simultaneous

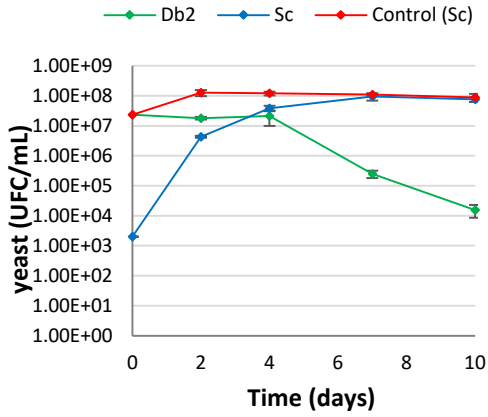

Sequential

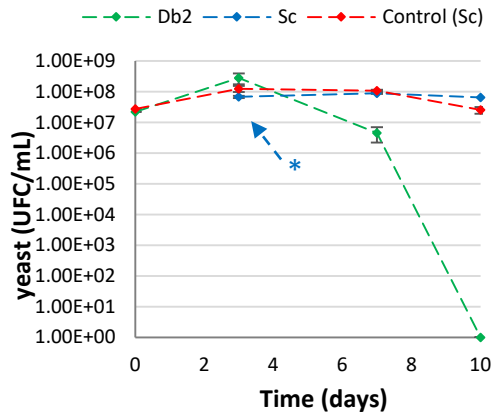

B)

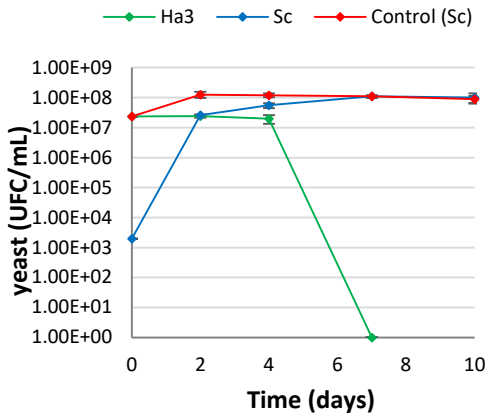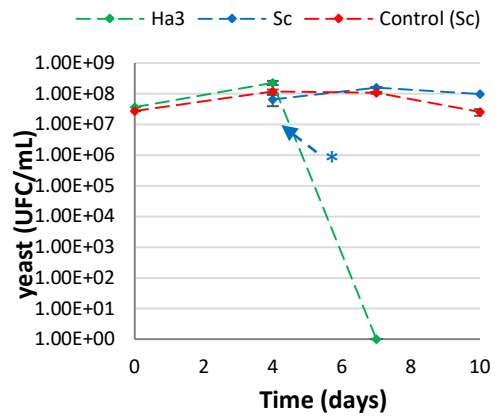

C)

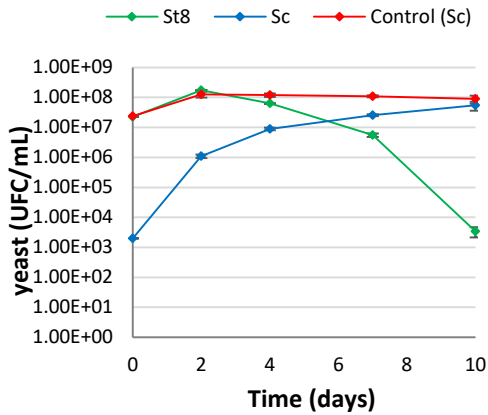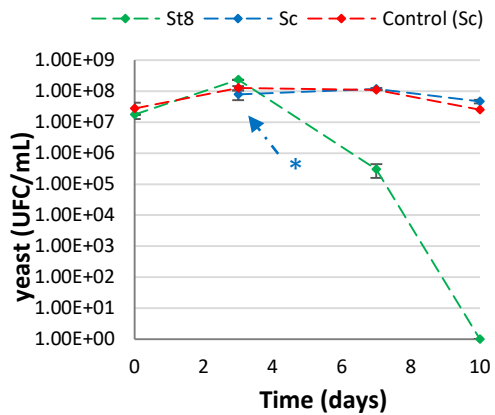

D)

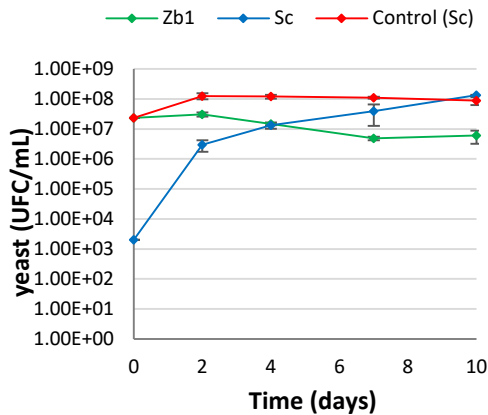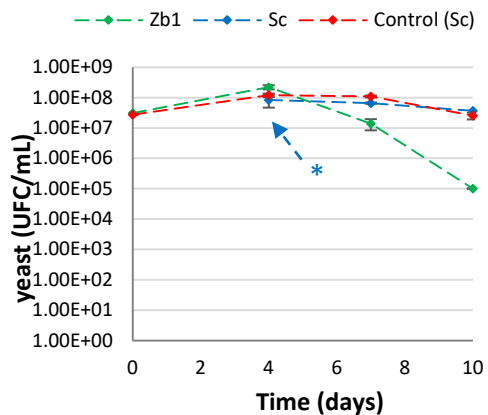

Fig. 3

A)

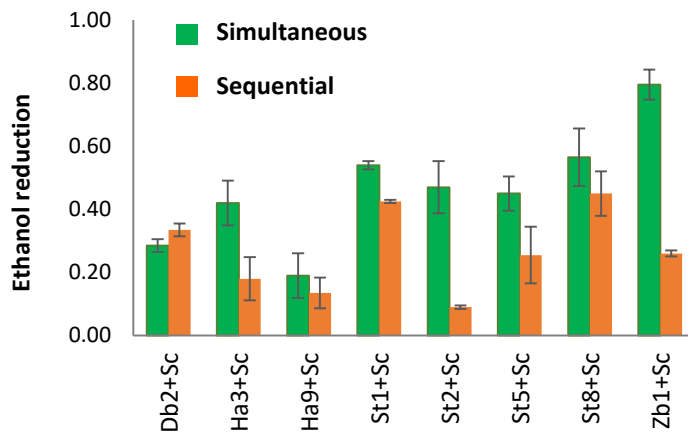

B)

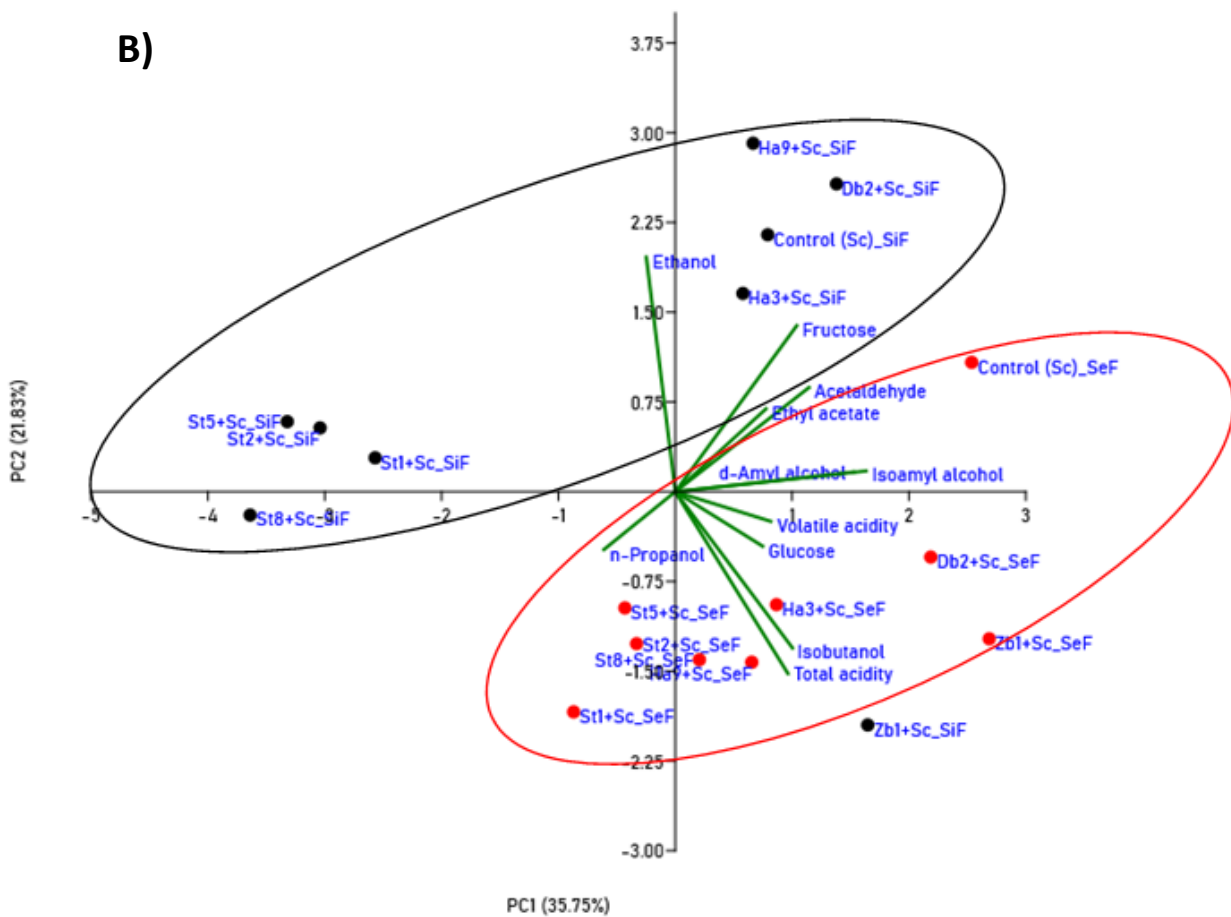

A)

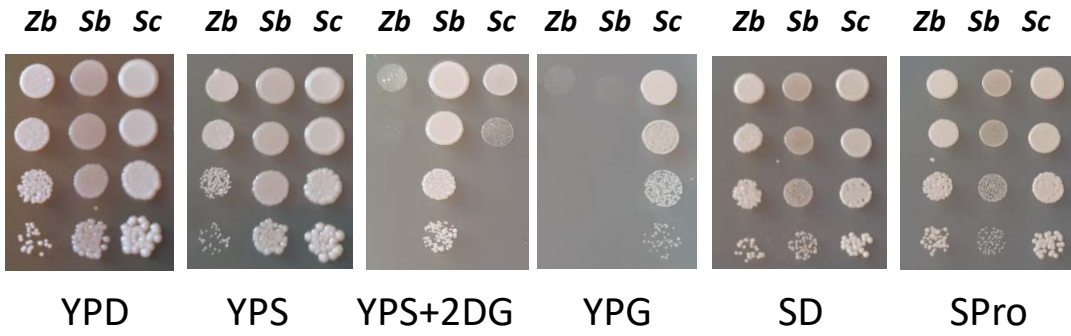

B)

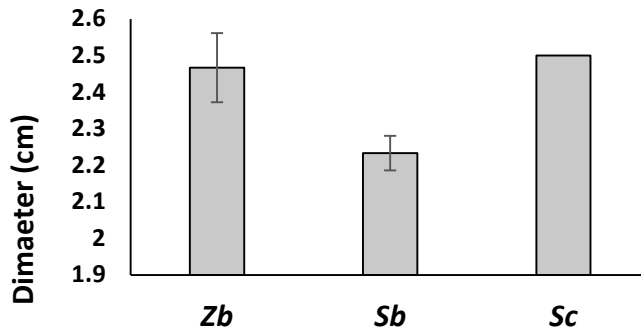

C)

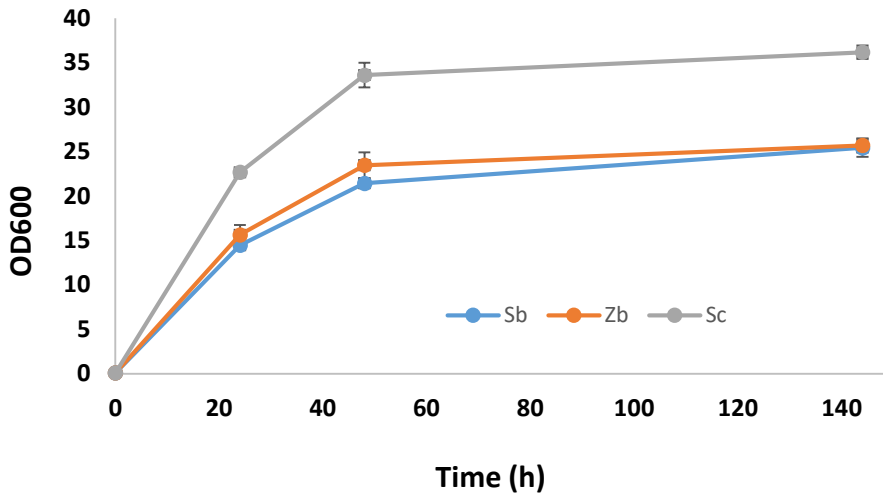

D)

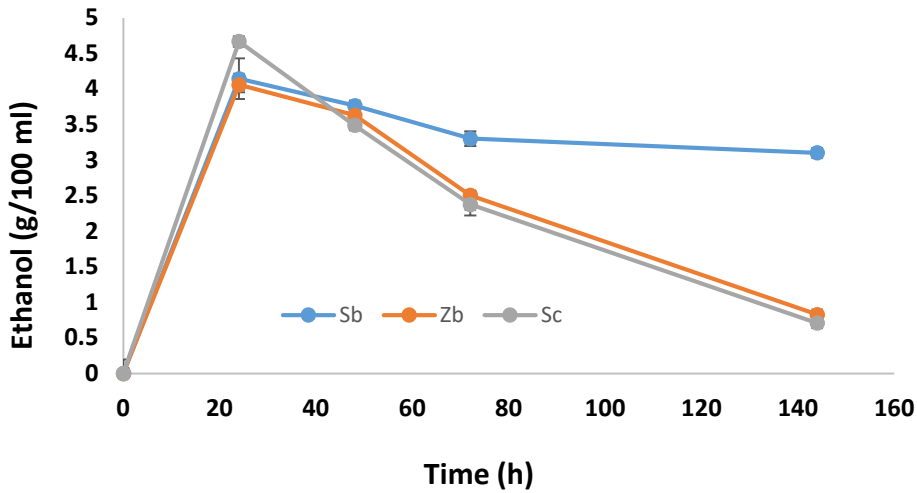



**Fig. 5**

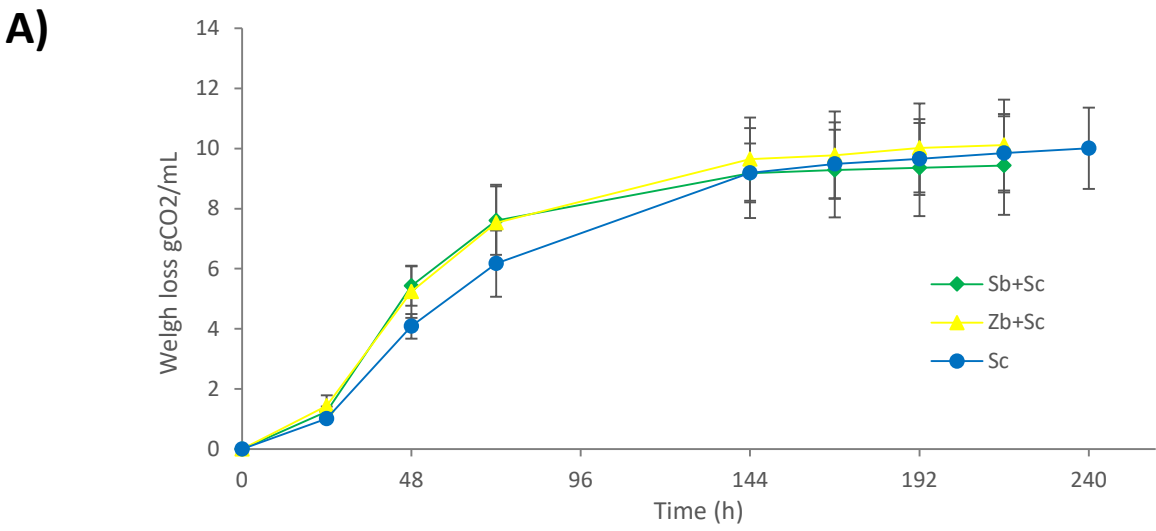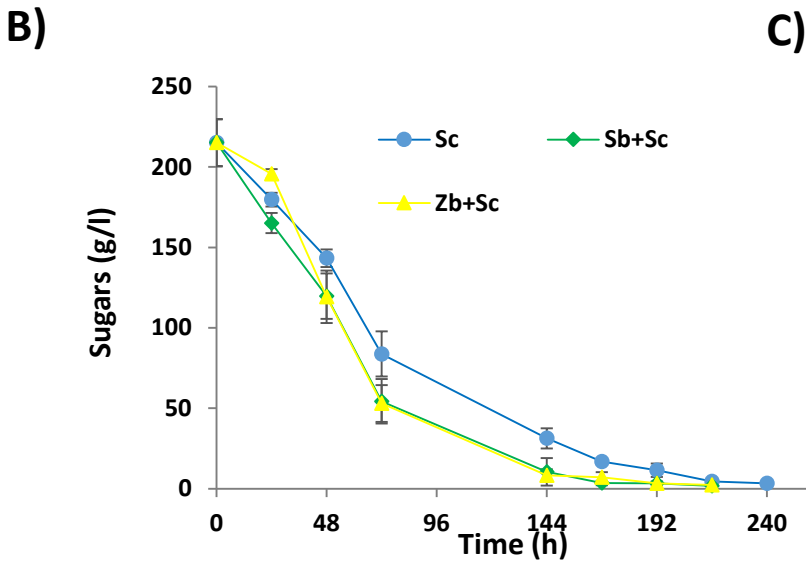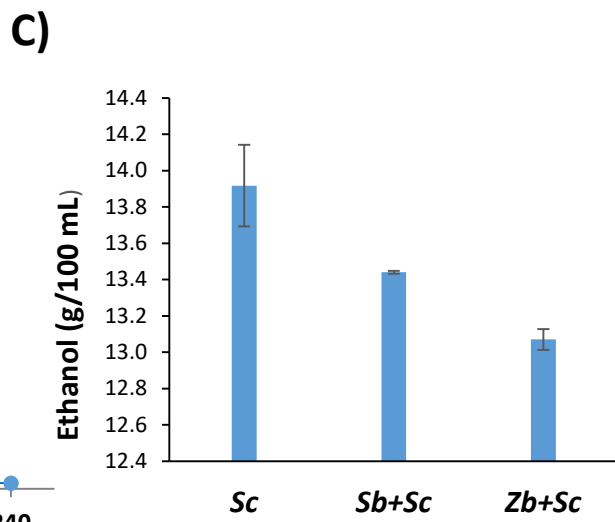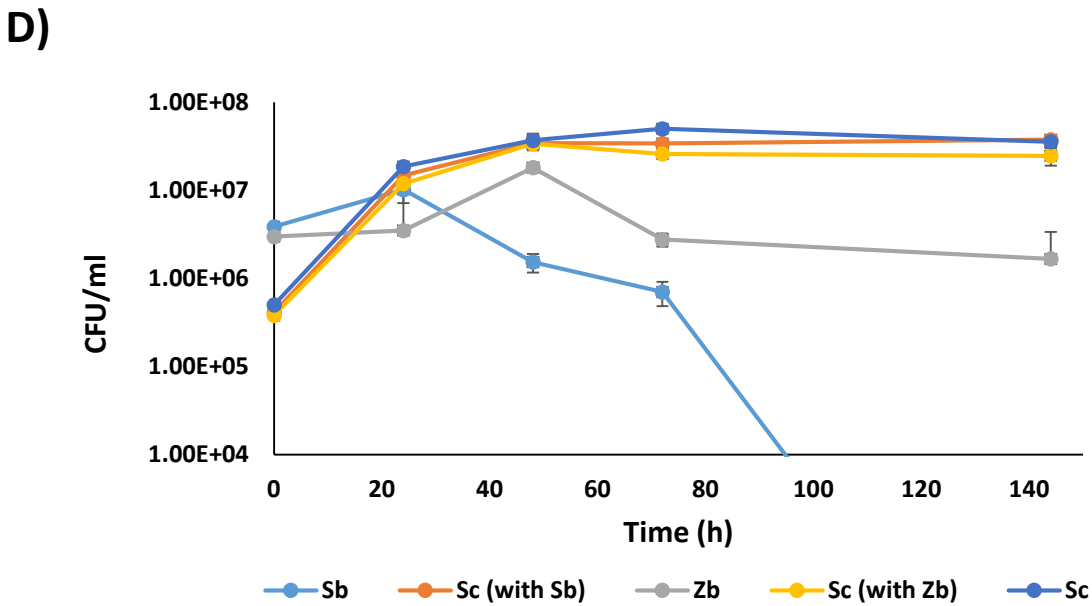

Source: https://www.biorxiv.org/content/10.1101/2021.11.11.467398v1.full.pdf
